# Supplementary material for: Do alternative weighting approaches for an Index of Multiple Deprivation change the association with mortality? A sensitivity analysis from Germany
Source: PubMed Central journal article supplement — BMJ Open. 2019 Aug 26;9(8):e028553. doi: 10.1136/bmjopen-2018-028553 (PMC6719755; doi:10.1136/bmjopen-2018-028553), 2019-08-26
Supplement: bmjopen-2018-028553.draft_revisions.pdf [file bmjopen-2018-028553.draft_revisions.pdf]

# BMJ Open

BMJ Open is committed to open peer review. As part of this commitment we make the peer review history of every article we publish publicly available.

When an article is published we post the peer reviewers' comments and the authors' responses online. We also post the versions of the paper that were used during peer review. These are the versions that the peer review comments apply to.

The versions of the paper that follow are the versions that were submitted during the peer review process. They are not the versions of record or the final published versions. They should not be cited or distributed as the published version of this manuscript.

BMJ Open is an open access journal and the full, final, typeset and author-corrected version of record of the manuscript is available on our site with no access controls, subscription charges or pay-per-view fees (<http://bmjopen.bmj.com>).

If you have any questions on BMJ Open's open peer review process please email [info.bmjopen@bmj.com](mailto:info.bmjopen@bmj.com)

# BMJ Open

## Evaluation of alternative weighting approaches for the German Index of Multiple Deprivation

|                               |                                                                                                                                                                                                                                                                                                                                                                                                                                                                                                           |
|-------------------------------|-----------------------------------------------------------------------------------------------------------------------------------------------------------------------------------------------------------------------------------------------------------------------------------------------------------------------------------------------------------------------------------------------------------------------------------------------------------------------------------------------------------|
| Journal:                      | <i>BMJ Open</i>                                                                                                                                                                                                                                                                                                                                                                                                                                                                                           |
| Manuscript ID                 | bmjopen-2018-028553                                                                                                                                                                                                                                                                                                                                                                                                                                                                                       |
| Article Type:                 | Research                                                                                                                                                                                                                                                                                                                                                                                                                                                                                                  |
| Date Submitted by the Author: | 13-Dec-2018                                                                                                                                                                                                                                                                                                                                                                                                                                                                                               |
| Complete List of Authors:     | Schederecker, Florian; Helmholtz Zentrum München (GmbH), Institute of Health Economics and Health Care Management<br>Kurz, Christoph; Helmholtz Zentrum München Deutsches Forschungszentrum für Umwelt und Gesundheit, Institute of Health Economics and Health Care Management<br>Fairburn, Jon; Staffordshire University, Business School<br>Maier, Werner; German Research Center for Environmental Health (GmbH), Institute of Health Economics and Health Care Management, Helmholtz Zentrum München |
| Keywords:                     | Area deprivation, German Index of Multiple Deprivation, domains, weighting, mortality                                                                                                                                                                                                                                                                                                                                                                                                                     |
|                               |                                                                                                                                                                                                                                                                                                                                                                                                                                                                                                           |

SCHOLARONE™  
Manuscripts

# Evaluation of alternative weighting approaches for the German Index of Multiple Deprivation

Florian Schederecker <sup>1,2</sup>, Christoph Kurz <sup>1,4</sup>, Jon Fairburn <sup>3</sup>, Werner Maier <sup>1,4</sup>

<sup>1</sup> Institute of Health Economics and Health Care Management, Helmholtz Zentrum München (GmbH), Neuherberg, Germany

<sup>2</sup> IBE – Institute for Medical Information Processing, Biometry and Epidemiology, LMU Munich, Germany

<sup>3</sup> Business School, Staffordshire University, UK

<sup>4</sup> German Center for Diabetes Research (DZD), Neuherberg, Germany

**Corresponding Author:** Dr. Werner Maier

**Postal Address:** Helmholtz Zentrum München (GmbH), Institute of Health Economics and Health Care Management, Ingolstädter Landstr. 1, D-85764 Neuherberg, Germany

**Email:** [werner.maier@helmholtz-muenchen.de](mailto:werner.maier@helmholtz-muenchen.de)

**Telephone Number:** 0049-89-3187-4187

**Word count:** 3735

## ABSTRACT

### Objectives:

This study aimed to assess the impact of using different weighting procedures for the German Index of Multiple Deprivation (GIMD) investigating their link to mortality rates.

**Design and setting:** In addition to the original (normative) weighting of the GIMD domains, four alternative weighting approaches were applied: equal weighting, linear regression, maximization algorithm and factor analysis. Correlation analyses to quantify the association between the differently weighted GIMD versions and mortality based on district-level official data from Germany in 2010 were applied (N=412 districts).

**Outcome measures:** Total mortality (all age groups) and premature mortality (< 65 years).

**Results:** All correlations of the GIMD versions with both total and premature mortality were highly significant ( $p < 0.001$ ). The comparison of these associations using Williams's t-test for paired correlations showed significant differences, which proved to be small in respect to absolute values of Spearman's rho (total mortality: between 0.535 and 0.615; premature mortality: between 0.699 and 0.832).

**Conclusions:** The association between area deprivation and mortality proved to be stable, regardless of different weighting of the GIMD domains. The theory-based weighting of the GIMD should be maintained, due to the stability of the GIMD scores and the relationship to mortality.

**Keywords:** Area deprivation, German Index of Multiple Deprivation, domains, weighting, mortality

## STRENGTHS AND LIMITATIONS OF THIS STUDY

- There is only limited literature on the application of different weighting approaches of deprivation indices – this study adds to that body of work.
- Our study provides an overview of established weighting approaches for deprivation indices used in Europe.
- We compare different weighting approaches for the domains of the German Index of Multiple Deprivation (GIMD) using also a greedy maximization algorithm.
- Limited selection of methods due to restricted data access at regional level.

## INTRODUCTION

Indices of deprivation are increasingly being used to investigate health and, in some countries, as tools of public policy [1-5]. Therefore, it is important that these indices are transparent and rigorous in their construction so that confidence and understanding in their use are maintained.

In the 2000s, a series of deprivation indices with a multidimensional structure were introduced in the UK. These ‘Indices of Multiple Deprivation’ (IMDs) have been updated regularly ever since [6]. The domains of deprivation were identified from the literature and were a result of the availability of data at the time. A key aspect to consider when constructing such indices is the weighting and consolidation of the different deprivation domains that produce the final overall index.

Transparency and availability of data used in the indices mean that indicators and weightings can be adapted to particular demands by researchers. Adaptation may be needed, for example

1  
2  
3 to prevent autocorrelation effects where a component of the index is also related to the  
4 independent variable under consideration.  
5  
6

7  
8 An IMD for Germany has been developed based on the methodology according to Noble et  
9 al. [6]. It was first applied in the German federal state of Bavaria ('Bavarian Index of  
10 Multiple Deprivation', BIMD) and subsequently as a nationwide IMD ('German Index of  
11 Multiple Deprivation', GIMD) [7, 8]. For the construction of the German deprivation indices,  
12 domains from the British IMDs were partly used (e.g. income and employment), and  
13 additional domains for social capital and municipal revenue were introduced. The GIMD  
14 includes both aspects, material deprivation (e.g. income) as well as social deprivation (e.g.  
15 social capital).  
16  
17

18 The GIMD has been used repeatedly for analyses regarding the relationship between area  
19 deprivation and morbidity, mortality and health care provision in Germany, and a persistent  
20 positive association has been shown between area deprivation and health outcomes [9-11].  
21  
22

23 One crucial point in building IMDs involves the weighting of the different deprivation  
24 domains. So far, weightings of IMDs have been conducted mainly by analysing literature on  
25 multiple deprivation and based on expert consultation [12]. Regarding the domain weights of  
26 the English IMD, alternative empirical weightings were carried out by C. Dibben, which led  
27 to a recommendation of adjustment of the weights [13]. However, this did not yield an  
28 alteration in the weighting of subsequent IMDs, as user surveys 'did not reveal significant  
29 support for moving to new weights' [12], and consisted only of two different empirical  
30 methods.  
31  
32

33 Besides the IMDs in the UK and Germany, several alternative approaches to the development  
34 and weighting of deprivation indices have been developed in other European countries [14]  
35 as well as non-European countries [15, 16]. These approaches consist of a variety of  
36  
37  
38  
39  
40  
41  
42  
43  
44  
45  
46  
47  
48  
49  
50  
51  
52  
53  
54  
55  
56  
57  
58  
59  
60

1  
2  
3 (empirical) weighting approaches, which have not been applied to the British IMDs.  
4  
5 However, it seems that almost all the approaches to weight deprivation indices are based on  
6  
7 single methods, and sensitivity analysis regarding the application of different methods to a  
8  
9 specific deprivation index has not been done. Additionally, literature regarding the  
10  
11 application of different weighting procedures to a deprivation index is lacking. As the GIMD  
12  
13 was weighted following the model of the British IMDs, we decided to examine several  
14  
15 alternative weighting approaches for the domains of the GIMD by stepwise comparison:  
16  
17

- 18  
19  
20 1. From a literature review, we obtain an overview of weighting approaches for deprivation  
21  
22 indices in Europe and select methods that can be used for alternative weighting approaches to  
23  
24 the domains of the GIMD.  
25  
26
- 27  
28 2. Regarding the weighting of the domains and the distribution of the GIMD scores, we  
29  
30 analyse the results of the different weighting approaches and compare them with each other.  
31  
32
- 33  
34 3. We compare the associations of these new versions of the GIMD with total mortality (all  
35  
36 age groups) and premature mortality in Germany (< 65 years) in order to conduct a sensitivity  
37  
38 analysis concerning the different approaches.  
39  
40
- 41  
42 4. Finally, we identify the weighting set that maximizes the association between the GIMD  
43  
44 and mortality.  
45

46 A conceptual distinction between the different weighting methods was established with the  
47  
48 identification of normative and empirically based approaches.  
49  
50  
51  
52  
53  
54  
55  
56  
57  
58  
59  
60

## **METHODS**

### **Data for the statistical analysis**

In order to construct different GIMD versions using alternative weighting approaches, we used regional data from the original GIMD from 2010 (GIMD 2010) for the domain and composite scores of the 412 districts in Germany [17]. For the construction of the original GIMD, Maier et al. standardized nine deprivation indicators and assigned them to seven deprivation domains, which represent different dimensions of deprivation: income, employment, education, environment, security, municipal revenue and social capital (Supplement 1). Each district is provided with a deprivation score for every single domain. The domain score is a statistical measure for the extent of area deprivation in a regional unit. The higher the deprivation within a district, the higher the domain score for the district. Subsequently, the domain scores are weighted based on a theoretical foundation and expert consultation and summed for an overall deprivation score for every district. For further details, see Maier et al. [7, 17].

Regarding an analysis of the relationship between area deprivation and both total mortality and premature mortality, we used raw mortality data and population data from 2010 at the district level, derived from the German Federal Statistical Office [18]. The districts were identified by official district code numbers. Using the mortality and population data, we indirectly calculated standardized mortality rates (SMRs) for both total mortality (SMR ‘total’) as well as premature mortality (SMR ‘premature’). This was necessary to compare districts because of their highly varying population size [19].

### **Methods for the weighting and methods for the statistical analysis**

Additional to the original weighting of the GIMD 2010, we decided to use four methods for the weighting of the GIMD domains found in a literature review (Table 1).



1  
2  
3  
4  
5  
6  
7  
8  
9  
10  
11  
12  
13  
14  
15  
16  
17  
18  
19  
20  
21  
22  
23  
24  
25  
26  
27  
28  
29  
30  
31  
32  
33  
34  
35  
36  
37  
38  
39  
40  
41  
42  
43  
44  
45  
46  
47  
48  
49  
50  
51  
52  
53  
54  
55  
56  
57  
58  
59  
60

For peer review only

Table 1: Overview of identified weighting methods through a systematic literature review: characteristics and evaluation of the methods (abbreviations in brackets)

| Normative weighting of the domains/indicators               |                                                                                                                                |                                                                                                                            | Empirical weighting of the domains/indicators                                                                                         |                                                                                                             |                                                                                                                                                           |                                                                                                     |                                                                                                                                                     |                                                                                                                                    |                                                                                                             |
|-------------------------------------------------------------|--------------------------------------------------------------------------------------------------------------------------------|----------------------------------------------------------------------------------------------------------------------------|---------------------------------------------------------------------------------------------------------------------------------------|-------------------------------------------------------------------------------------------------------------|-----------------------------------------------------------------------------------------------------------------------------------------------------------|-----------------------------------------------------------------------------------------------------|-----------------------------------------------------------------------------------------------------------------------------------------------------|------------------------------------------------------------------------------------------------------------------------------------|-------------------------------------------------------------------------------------------------------------|
| Weighting methods                                           | Equal weighting of domains/indicators                                                                                          | Expert weighting of the domains/ indicators                                                                                | Theory-based weighting of the domains                                                                                                 | Logistic regression                                                                                         | Principal components analysis (PCA)                                                                                                                       | Bayesian factor analysis                                                                            | Exploratory factor analysis (EFA)                                                                                                                   | Confirmatory factor analysis (CFA)                                                                                                 | Revealed preferences                                                                                        |
| <b>Description and weighting of the indicators/ domains</b> | - Equal weighting of the domains/ indicators                                                                                   | - Weighting of the domains/ indicators according to expert opinion                                                         | - Weighting of the domains: derived from research literature on multiple deprivation and social exclusion and by consultation process | - Deprivations: proxy as dependent, coefficients as relative weights of the domains                         | - Extraction of factors from indicators<br><br>- Factors used as deprivation index/indices<br><br>- Factor loadings as relative weights of the indicators |                                                                                                     |                                                                                                                                                     | - Number of factors derived from research literature<br><br>- Factor loadings as relative weights of the indicators                | - Proportion of government spending allocated to each domain of the IMD was used to derive a set of weights |
| <b>Construction index</b>                                   | Additive score of the equally weighted indicators or domains                                                                   | Additive score of the weighted indicators or domains                                                                       |                                                                                                                                       |                                                                                                             |                                                                                                                                                           |                                                                                                     |                                                                                                                                                     |                                                                                                                                    |                                                                                                             |
| <b>Selected advantages of the methods</b>                   | - Simplest solution for aggregation of indicators to an overall score [20]<br><br>- Equal relevance of all indicators/ domains | - Different weighting of the indicators, according to the individual relevance<br><br>- Based on expert knowledge [20, 21] | - Weights derived from theory and research literature [6]                                                                             | - Weights derived directly from the data [20]<br><br>- Easy handling of the model and the coefficients [21] | - Weights derived directly from the data [20]<br><br>- Easy handling, often used and robust approach [21-23]                                              | - Weights derived directly from the data [20]<br><br>- Suited for analysis of small area units [24] | - Statistical model<br><br>- Derivation of number of factors by model fit [25]<br><br>- Exploration of latent dimensions without foreknowledge [25] | - Dimensions of deprivation derived from theory and set a priori [23]<br><br>- Measures of goodness of fit and error of model [25] | - Relative relevance of the domains, which influence public life, reflected by government spending [13]     |

1  
2  
3  
4  
5  
6  
7  
8  
9  
10  
11  
12  
13  
14  
15  
16  
17  
18  
19  
20  
21  
22  
23  
24  
25  
26  
27  
28  
29  
30  
31  
32  
33  
34  
35  
36  
37  
38  
39  
40  
41  
42  
43  
44  
45  
46

|                                              |                                                                                                                                                    |                                                                      |                                                                                                                                 |                                                                                                                                                                                         |                                                                                                                                                                                                          |                                                                                                                                                    |                                                                                                                                                                            |                                                                                                                                                                                                 |                                                                                      |
|----------------------------------------------|----------------------------------------------------------------------------------------------------------------------------------------------------|----------------------------------------------------------------------|---------------------------------------------------------------------------------------------------------------------------------|-----------------------------------------------------------------------------------------------------------------------------------------------------------------------------------------|----------------------------------------------------------------------------------------------------------------------------------------------------------------------------------------------------------|----------------------------------------------------------------------------------------------------------------------------------------------------|----------------------------------------------------------------------------------------------------------------------------------------------------------------------------|-------------------------------------------------------------------------------------------------------------------------------------------------------------------------------------------------|--------------------------------------------------------------------------------------|
| <b>Selected disadvantages of the methods</b> | - Unintentional, implicit weighting of the domains of multiple deprivation possible (owing to the number of indicators included per dimension) [6] | - Arbitrary weighting possible, because of subjective decisions [20] | - Selected weights dependent on the quality of the research from the literature<br><br>- Normative, subjective setting [21, 26] | - Derived coefficient dependent on the data quality<br><br>- Removal or addition of variables can alter the coefficients significantly [20]<br>- Large omitted variables, bias possible | - Descriptive data reduction of the variables [25]<br><br>- All variables load on all factors [23]<br><br>- Transferability to the population limited because of explanation of the sample variance [25] | - Derived coefficient dependent on the data quality<br><br>- Reduction to one factor does not consider the multidimensionality of deprivation [23] | - Reliability is dependent on data quality<br>- Restricted temporal comparability [20]<br><br>- Different interpretability of the results, several decisions required [25] | - Elaborate procedure: theoretical knowledge and conceptualization required [25]<br><br>- Several decisions required regarding covariance structure and the method of parameter estimation [25] | - Overlap of the spending for the domains possible, unambiguous allocation elaborate |
| <b>Selected examples</b>                     | [27]                                                                                                                                               | [28]                                                                 | [8, 12]                                                                                                                         | [13]                                                                                                                                                                                    | [29]                                                                                                                                                                                                     | [24]                                                                                                                                               | [30]                                                                                                                                                                       | [31]                                                                                                                                                                                            | [13]                                                                                 |

Review only

1  
2  
3 Besides the equal weighting of the domains, we used two commonly used empirical methods  
4 and an additional greedy algorithm method. The purpose of the empirical approaches was to  
5 extract relative weights for the domain scores from an empirical dataset. The extracted  
6 coefficients of the methods were used as relative weights for the domain scores, which should  
7 sum to 1 (or 100%), before the summation of the domains to an overall deprivation score.  
8  
9

10  
11  
12  
13  
14  
15 *1. Original weighting of the domains of the GIMD through theoretical foundation and expert*  
16 *opinion according to Maier et al. [8]. For weights used, see Supplement 1.*  
17

18  
19  
20 *2. Equal weighting of the seven GIMD domains; thus, each domain weighted with 1/7.* This  
21 approach was originally used for deprivation indices by Carstairs and Townsend [32, 33]. To  
22 date, this approach is still used for deprivation indices consisting of just single deprivation  
23 indicators [26, 33]. For this approach, an equal effect of all deprivation indicators is assumed.  
24  
25 In our analysis, we transferred this approach to the domain level.  
26  
27

28  
29  
30  
31  
32 *3. Weighting of the domains by the coefficients of a linear regression analysis with a proxy*  
33 *for deprivation ('available living space per inhabitant') as the dependent variable and the*  
34 *GIMD domains as the independent variables.* We had to choose a dependent variable for the  
35 linear regression that had not been used for the construction of the GIMD domains and could  
36 be considered as an indicator of deprivation [13]. Townsend, Carstairs and Jarman considered  
37 overcrowding of living space as an indicator of deprivation [28, 32, 33]. We assumed that the  
38 availability of living space per inhabitant in an area could act as a proxy for area deprivation:  
39 the more deprived the area, the less living space is available per inhabitant [34-36]. For this  
40 approach, we calculated the absolute value of the regression coefficients and then used them  
41 as relative weights for the specific domains. Subsequently, the weighted domain scores were  
42 summed to an overall score. Linear models for the extraction of weights for a deprivation  
43 score have already been conducted in several studies [13, 37-38]. Because of the normal  
44  
45  
46  
47  
48  
49  
50  
51  
52  
53  
54  
55  
56  
57  
58  
59  
60

1  
2  
3 distribution of the dependent variable, we conducted an ordinary least square (OLS)  
4 regression.  
5  
6

7  
8 *4. Weighting of the GIMD domains using a greedy maximization algorithm [39].* This yields  
9 weights for the domains close to the maximum possible correlation between the GIMD 2010  
10 and mortality as a relevant outcome of deprivation. The weighted domain scores of the GIMD  
11 were then added together to an overall index for both total mortality and premature mortality.  
12 This addition to the methods of the literature search aimed to extract weights for the  
13 maximum Spearman correlation between GIMD and mortality and can thus be seen as an  
14 outcome-specific approach with the independent variable mortality. Complete circularity was  
15 present because mortality had already been used for the extraction of the weights. In contrast,  
16 the other methods could be seen as general weighting approaches for deprivation indices.  
17  
18  
19  
20  
21  
22  
23  
24  
25  
26  
27  
28

29  
30 *5. Weighting of the domains according to the results of an exploratory factor analysis (EFA).*  
31 We chose a principal axis factoring (PAF) approach for the extraction of the factors. PAF is a  
32 commonly used extraction method for factor analysis and requires no specific distribution of  
33 the entered variables. This non-parametric approach was necessary because of the  
34 exponentially transformed domains [25]. A priori, we specified the extraction of one factor (as  
35 a latent factor, measuring ‘multiple deprivation’) out of the seven domains. The absolute  
36 values of the factor loadings of the different domains were used as relative weights for the  
37 domains. Again, the weighted domains were added together to an overall deprivation score.  
38  
39  
40  
41  
42  
43  
44  
45  
46  
47  
48

#### 49 **Correlation analysis and statistical software**

50 Subsequently, we performed a sensitivity analysis of the newly weighted GIMD versions. We  
51 conducted correlation analyses in order to calculate the relationship between the different  
52 GIMD versions and both total as well as premature mortality (in terms of SMRs) and  
53 compared their results. For the analysis, we used Spearman’s rank correlation coefficient ( $\rho$ )  
54 as a robust approach. This was required, in our opinion, as the GIMD score could be  
55  
56  
57  
58  
59  
60

1  
2  
3 interpreted as an ordinal variable because of the ranking of the districts during the generation  
4 of the domain scores [7, 40]. Correlation analyses were each performed with a GIMD version  
5 and both total mortality and premature mortality. We also tested for significance of these  
6 bivariate correlation coefficients at an  $\alpha$ -level of 5% [41]. For comparison of the bivariate  
7 correlations among each other, we performed t-tests for paired correlations. For this, we used  
8 Williams's t-test for the comparison of correlations out of dependent samples [42]. We  
9 compared two correlation coefficients in terms of both total and premature mortality at an  $\alpha$ -  
10 level of 5%. For the statistical analysis, we used the Software R, version 3.2.3 [43].  
11  
12  
13  
14  
15  
16  
17  
18  
19  
20  
21  
22

### 23 **Patient and Public Involvement**

24 Patients and/or public were not involved in this study.  
25  
26  
27  
28  
29  
30  
31  
32

## 33 **RESULTS**

### 34 **Population size of the districts and estimation of the SMRs**

35  
36 The size of the population of the 412 districts varied with median size of 139,188 inhabitants,  
37 IQR of 130,170 persons, minimum size of 33,944 and maximum size of 3,460,725 persons.  
38 Raw mortality of the 412 districts varied with median of 1,522 death cases, IQR of 1,347  
39 cases, minimum of 413 cases and maximum of 32,234 cases. Qualifying date of the data was  
40 31<sup>st</sup> December 2010. We estimated total mortality by calculating 'SMR<sub>total</sub>' for the districts  
41 with a mean of 1.0175 (standard error (SE): 0.004) and premature mortality 'SMR<sub>premature</sub>'  
42 with a mean of 1.0165 (SE: 0.004). For details on the calculation of the SMRs, see  
43 Supplement 2.  
44  
45  
46  
47  
48  
49  
50  
51  
52  
53  
54  
55  
56  
57  
58  
59  
60

### **Weights of the domains of the alternative approaches**

An overview of the identified weighting methods for deprivation indices is given in Table 1. Alongside a description of the weighting and the construction of the deprivation indices, we offered selected advantages and disadvantages of the methods. This was completed with selected examples. From this table, we chose four approaches additional to the original weighting of the GIMD.

We found considerable differences between the domain weights resulting from the different approaches (Table 2).

Table 2: Weighting of the domains of the GIMD<sup>1</sup> through different weighting approaches, values in percentage points

| Deprivation domains/<br>methods of<br>domain<br>weighting of<br>the GIMD <sup>1</sup> | Income | Employment | Education | Municipal<br>revenue | Social<br>capital | Environment | Security |
|---------------------------------------------------------------------------------------|--------|------------|-----------|----------------------|-------------------|-------------|----------|
| <b>Original weighting</b>                                                             | 25.00  | 25.00      | 15.00     | 15.00                | 10.00             | 5.00        | 5.00     |
| <b>Equal weighting</b>                                                                | 14.29  | 14.29      | 14.29     | 14.29                | 14.29             | 14.29       | 14.29    |
| <b>Linear regression</b>                                                              | 4.47   | 21.68      | 15.42     | 30.25                | 11.45             | 14.65       | 2.09     |
| <b>Maximization algorithm (total mortality)</b>                                       | 18.23  | 20.67      | 1.04      | 21.90                | 28.26             | 4.62        | 5.28     |
| <b>Maximization algorithm (premature mortality)</b>                                   | 18.85  | 48.93      | 0.31      | 15.98                | 10.73             | 0.50        | 4.70     |
| <b>Factor analysis</b>                                                                | 23.09  | 18.99      | 8.97      | 21.72                | 20.08             | 5.86        | 1.28     |

<sup>1</sup> GIMD: German Index of Multiple Deprivation;

**Original weighting:** Weighting according to Maier et al. [8];

**Equal weighting:** Every domain gets equal weighting ( $1/7 = 0.1429$ );

**Linear regression:** Weighting of the domains with regression coefficients with a deprivation proxy as dependent and domains as independent variables;

**Maximization algorithm:** Weighting of the domains in order to achieve the maximum Spearman correlation between overall index and mortality;

**Factor analysis:** Weighting of the domains with loadings from principal axis factoring .



1  
2  
3 The weights for employment deprivation showed the largest variation with a range of 34  
4 percentage points. The other deprivation domains showed a dispersion of at least 14  
5 percentage points. Educational deprivation within the maximization algorithm and income  
6 deprivation within the linear regression showed very small weights compared with the  
7 weights of the original GIMD 2010. Municipal revenue deprivation resulted in a weight twice  
8 as high as the original weight within the linear regression. Concerning the algorithm, the  
9 weight for social capital deprivation was three times the original weight. Concerning  
10 premature mortality, the weight for employment deprivation was twice as high as the original  
11 weight for the GIMD. Deprivation domains for social capital and district income showed  
12 constantly higher weights for the empirical approaches compared with the two normative  
13 methods. The different GIMD versions revealed different distributions of the overall  
14 deprivation scores (Table 3).  
15  
16  
17  
18  
19  
20  
21  
22  
23  
24  
25  
26  
27  
28  
29  
30  
31  
32  
33  
34  
35  
36  
37  
38  
39  
40  
41  
42  
43  
44  
45  
46  
47  
48  
49  
50  
51  
52  
53  
54  
55  
56  
57  
58  
59  
60

Table 3: Descriptive results of the weighted indices, information on GIMD<sup>1</sup> scores

|                            | <b>Original<br/>weighting</b> | <b>Equal<br/>weighting</b> | <b>Linear<br/>regression</b> | <b>Maximization<br/>algorithm SMR<sup>2</sup> ‘total’<br/>(SMR<sup>2</sup> ‘premature’)</b> | <b>Factor analysis</b> |
|----------------------------|-------------------------------|----------------------------|------------------------------|---------------------------------------------------------------------------------------------|------------------------|
| <b>Number of districts</b> | 412                           | 412                        | 412                          | 412 (412)                                                                                   | 412                    |
| <b>Mean</b>                | 21.81                         | 21.81                      | 21.81                        | 21.81 (21.81)                                                                               | 21.81                  |
| <b>Median</b>              | 18.80                         | 19.97                      | 19.34                        | 17.05 (16.49)                                                                               | 18.17                  |
| <b>Standard deviation</b>  | 12.73                         | 10.34                      | 10.98                        | 15.61 (17.09)                                                                               | 14.24                  |
| <b>Variance</b>            | 162.03                        | 106.98                     | 120.65                       | 243.63 (292.03)                                                                             | 202.89                 |
| <b>Minimum</b>             | 2.04                          | 2.29                       | 2.11                         | 1.48 (0.92)                                                                                 | 1.33                   |
| <b>Maximum</b>             | 70.98                         | 55.69                      | 67.67                        | 85.91 (91.14)                                                                               | 79.86                  |

<sup>1</sup>**GIMD:** German Index of Multiple Deprivation

<sup>2</sup> **SMR:** Standardized mortality ratio

**Original weighting:** Weighting according to Maier et al. [8];

**Equal weighting:** Every domain gets equal weighting ( $1/7 = 0.1429$ );

**Linear regression:** Weighting of the domains with regression coefficients with a deprivation proxy as dependent and domains as independent variables;

**Maximization algorithm:** Weighting of the domains in order to achieve the maximum Spearman correlation between overall index and both total mortality (SMR ‘total’) and premature mortality (SMR ‘premature’ in brackets);

**Factor analysis:** Weighting of the domains with loadings from principal axis factoring.

1  
2  
3 Assumptions for the linear regression were generally met, and the model had significant  
4 explanatory power (adj.  $R^2 = 0.33$ ). Five of the seven domains showed a significant effect on  
5 the deprivation proxy. Heterogeneity was present; thus, we presented robust standard errors  
6 (Supplement 3). The factor analysis generally had significant explanatory power (Chi-square:  
7 584.65,  $p < 0.0001$ ) and showed moderate reliability (Tucker–Lewis index = 0.50)  
8 (Supplement 4).  
9  
10  
11  
12  
13  
14  
15  
16  
17  
18  
19  
20

### 21 **Results of the statistical analysis**

22 Correlation analysis between the differently weighted deprivation indices and mortality  
23 showed different results (Table 4).  
24  
25  
26  
27  
28  
29  
30  
31  
32  
33  
34  
35  
36  
37  
38  
39  
40  
41  
42  
43  
44  
45  
46  
47  
48  
49  
50  
51  
52  
53  
54  
55  
56  
57  
58  
59  
60

Table 4: Spearman's rank correlation coefficients for the association between the versions of the GIMD<sup>1</sup> and both premature and total mortality.

| Methods of the domain weighting of the GIMD <sup>1</sup> | Total mortality (SMR <sup>2</sup> 'total') | Premature mortality (SMR <sup>2</sup> 'premature') |
|----------------------------------------------------------|--------------------------------------------|----------------------------------------------------|
| <b>Original weighting</b>                                | 0.578*** [0.506, 0.642]                    | 0.767*** [0.718, 0.808]                            |
| <b>Equal weighting</b>                                   | 0.535*** [0.459, 0.604]                    | 0.699*** [0.641, 0.750]                            |
| <b>Linear regression</b>                                 | 0.564*** [0.492, 0.629]                    | 0.738*** [0.685, 0.784]                            |
| <b>Maximization algorithm</b>                            | 0.615*** [0.547, 0.676]                    | 0.832*** [0.794, 0.864]                            |
| <b>Factor analysis</b>                                   | 0.598*** [0.529, 0.661]                    | 0.772*** [0.724, 0.813]                            |

\*\*\* p < 0.001, bootstrapped (10,000 fold), 95% confidence intervals in square brackets

<sup>1</sup> **GIMD**: German Index of Multiple Deprivation

<sup>2</sup> **SMR**: Standardized mortality ratio

**Original weighting**: Weighting according to Maier et al. [8];

**Equal weighting**: Every domain gets equal weighting ( $1/7 = 0.1429$ );

**Linear regression**: Weighting of the domains with regression coefficients with a deprivation proxy as dependent and domains as independent variables;

**Maximization algorithm**: Weighting of the domains in order to achieve the maximum Spearman correlation between overall index and mortality;

**Factor analysis**: Weighting of the domains with loadings from principal axis factoring.

1  
2  
3 Deprivation indices, domains weighted by the maximization algorithm, showed the maximum  
4 correlation with total mortality ( $\rho = 0.615$ ) and premature mortality ( $\rho = 0.832$ ). Correlations  
5  
6 between the original GIMD and both total and premature mortality were  $\rho = 0.578$  and  $0.767$   
7  
8 respectively. Correlations between the equally weighted GIMD and mortality were the lowest  
9  
10 with  $\rho = 0.535$  and  $0.699$ . All correlations were significant concerning both total and  
11  
12 premature mortality ( $p < 0.001$ ). Additionally, bivariate correlations between all indices were  
13  
14 significant ( $\rho$  between  $0.86$  and  $0.98$ ).  
15  
16  
17  
18  
19

20 Pairwise comparisons of the correlation coefficients with Williams's t-tests showed a  
21  
22 differentiated result (see Table 5).  
23  
24  
25  
26  
27  
28  
29  
30  
31  
32  
33  
34  
35  
36  
37  
38  
39  
40  
41  
42  
43  
44  
45  
46  
47  
48  
49  
50  
51  
52  
53  
54  
55  
56  
57  
58  
59  
60

Table 5: Test<sup>1</sup> of the differences in the Spearman correlation coefficients for the relationship of the GIMD<sup>2</sup> versions and both total and premature mortality

| Total mortality               | Original weighting                        | Equal weighting            | Linear regression                        | Maximization algorithm         | Factor analysis                           |
|-------------------------------|-------------------------------------------|----------------------------|------------------------------------------|--------------------------------|-------------------------------------------|
| <b>Original weighting</b>     | 0                                         | 0.043**<br>[0.015, 0.074]  | 0.014 <sup>n.s.</sup><br>[-0.006, 0.034] | -0.037***<br>[-0.060, -0.016]  | -0.020**<br>[-0.038, -0.005]              |
| <b>Equal weighting</b>        | -0.043**<br>[-0.074, -0.015]              | 0                          | -0.029*<br>[-0.059, -0.001]              | -0.080***<br>[-0.122, -0.041]  | -0.063***<br>[-0.105, -0.025]             |
| <b>Linear regression</b>      | -0.014 <sup>n.s.</sup><br>[-0.034, 0.006] | 0.029*<br>[0.001, 0.059]   | 0                                        | -0.051***<br>[-0.080, -0.024]  | -0.034**<br>[-0.059, -0.011]              |
| <b>Maximization algorithm</b> | 0.037***<br>[0.016, 0.060]                | 0.080***<br>[0.041, 0.122] | 0.051***<br>[0.024, 0.080]               | 0                              | 0.016**<br>[0.003, 0.031]                 |
| <b>Factor analysis</b>        | 0.020**<br>[0.005, 0.038]                 | 0.063***<br>[0.025, 0.105] | 0.034**<br>[0.011, 0.059]                | -0.016 **<br>[-0.031, -0.003]  | 0                                         |
| <b>Premature mortality</b>    |                                           |                            |                                          |                                |                                           |
| <b>Original weighting</b>     | 0                                         | 0.068***<br>[0.044, 0.097] | 0.028***<br>[0.012, 0.049]               | -0.065***<br>[-0.093, -0.043]  | -0.005 <sup>n.s.</sup><br>[-0.021, 0.019] |
| <b>Equal weighting</b>        | -0.068***<br>[-0.097, -0.044]             | 0                          | -0.040***                                | -0.133***<br>[-0.174, -0.098]  | -0.073***<br>[0.110, -0.040]              |
| <b>Linear regression</b>      | -0.028***<br>[-0.049, -0.012]             | -0.040***                  | 0                                        | -0.094 ***<br>[-0.128, -0.066] | -0.034***<br>[-0.014, -0.057]             |
| <b>Maximization algorithm</b> | 0.065***<br>[0.043, 0.093]                | 0.133***<br>[0.098, 0.174] | 0.094***<br>[0.066, 0.128]               | 0                              | 0.060***<br>[0.037, 0.088]                |
| <b>Factor analysis</b>        | 0.005 <sup>n.s.</sup><br>[-0.019, 0.021]  | 0.073***<br>[0.040, 0.110] | 0.034***<br>[0.014, 0.057]               | -0.060***<br>[-0.088, -0.037]  | 0                                         |

\*\*\* p < 0.001; \*\* p < 0.01; \* p < 0.05; n.s. not significant, 95% confidence intervals in square brackets

<sup>1</sup> Test of the significance of the differences with Williams's t-test for paired correlations

<sup>2</sup> GIMD: German Index of Multiple Deprivation

**Original weighting:** Spearman correlation between GIMD (weighting according to Maier et al. [8]) and both total and premature mortality;

**Equal weighting:** Spearman correlation between GIMD (domains equally weighted) and both total and premature mortality;

**Linear regression:** Spearman correlation between GIMD (weighting of the domains with regression coefficients with a deprivation proxy as dependent and domains as independent variables) and both total and premature

1  
2  
3 mortality;

4  
5 **Maximization algorithm:** Spearman correlation between GIMD (weighting of the domains for the maximum  
6  
7 Spearman correlation between overall index and mortality) and both total and premature mortality;

8  
9 **Factor analysis:** Spearman correlation between GIMD (weighting of the domains with loadings from principal  
10  
11 axis factoring) and both total and premature mortality.  
12  
13  
14  
15

16 Almost every pairwise difference in the correlation coefficients was significant at the 5%  $\alpha$ -  
17  
18 level. One exception was the difference in the coefficients between the original GIMD and the  
19  
20 GIMD weighted by linear regression concerning total mortality. The other deviation was the  
21  
22 difference between the original GIMD and the GIMD weighted by factor analysis concerning  
23  
24 premature mortality. The difference was not significant, neither one-sided nor two-sided.  
25  
26  
27 Maximum correlation coefficients of the GIMD, weighted by the algorithm, differed  
28  
29 significantly from all the correlation coefficients of the other methods regarding both total and  
30  
31 premature mortality.  
32  
33  
34  
35  
36  
37

## 38 **DISCUSSION**

39  
40 The central objective of the study was to explore whether alternative weighting approaches  
41  
42 had an influence on the relationship between area deprivation and mortality when applied to  
43  
44 the GIMD. Thereby, different weighting methods were selected if they were, on the one hand,  
45  
46 applicable to the domain-based construction of the GIMD and, on the other hand, seemed  
47  
48 feasible in the course of an application of a multi-methodical approach. The four different  
49  
50 methods were applied to the weighting of the domains of the GIMD 2010. The selected  
51  
52 approaches and the original method were compared concerning both the weighting of the  
53  
54 domains of the GIMD and the relationship between GIMD and mortality.  
55  
56  
57  
58  
59  
60

1  
2  
3 There was little evidence in the literature concerning the application of different weighting  
4 methods for multidimensional deprivation indices. However, a summary of different  
5 weighting approaches and their classification was presented by Noble et al [6]. They briefly  
6 assessed the specific procedures of the methods (e.g. empirical approaches) and were in  
7 favour of a weighting driven by literature considerations on multiple deprivation. Regarding  
8 the application of empirical weighting approaches for the English IMD 2004, we want to  
9 emphasize Dibben's work [13]. He recommended new weights for the domains of the IMD,  
10 as the empirical weighting approaches indicated a higher weighting of the health domain and  
11 a lower weighting of the employment domain. However, this suggested swapping of weights  
12 was not eventually applied to the subsequent versions of the English IMD. The maintenance  
13 of the weights was justified by a consultation of IMD users and stable results of the IMD with  
14 either existing or suggested weights [12].

15  
16  
17  
18  
19  
20  
21  
22  
23  
24  
25  
26  
27  
28  
29  
30  
31 In this study, we pursued a multi-methodical approach for the weighting of the GIMD,  
32 including empirical methods. Owing to the different inherent intentions of the selected  
33 methods, we integrated the approaches as follows:

34  
35  
36  
37  
38  
39 *1. Normative approaches:* The original weighting of the domains according to Maier et al.  
40 through theory and experts' opinion. We used the term 'normative' because weights for the  
41 domains must be selected a priori subjectively before they can be validated with data.

42  
43  
44  
45  
46  
47 *2. Specific empirical approaches:* Concerning the maximization algorithm with the dependent  
48 variable mortality, a weighting of the domains has been sought that was in line with the  
49 relationship between area deprivation and both total mortality and premature mortality and  
50 should maximize the correlation between them.

51  
52  
53  
54  
55  
56  
57 *3. General empirical approaches:* In contrast to the specific empirical approaches, the  
58 weighting of the domains was realized according to the results of a linear regression model or  
59  
60



1  
2  
3 according to a factor analysis to generate generally applicable indices, which can also be used  
4  
5 for the analysis of other health outcomes.  
6  
7  
8  
9

### 10 11 **Assessment of the alternative weighting approaches**

12  
13 The high weighting of the deprivation domains income and employment of 50% altogether  
14 within the original GIMD was confirmed by the empirical weighting of the factor analysis  
15 approximately, as well as the weighting of the environment deprivation domain. Educational  
16 deprivation was weighted considerably lower by the factor analysis and algorithm than by the  
17 original GIMD. Deprivation domains for district income and social capital were constantly  
18 weighted much higher by the empirical approaches than by the approach of the original  
19 GIMD. The shift in the weighting of the domains can be explained by the data dependency of  
20 the empirical approaches and should be reviewed using alternative data. Should the higher  
21 weighting of the district income and social capital domains be confirmed, an adjustment in the  
22 domain weights could be considered. Perhaps those context variables have a higher relevance  
23 concerning area deprivation than expected by Maier et al. [8].  
24  
25  
26  
27  
28  
29  
30  
31  
32  
33  
34  
35  
36  
37  
38  
39

40 The low weighting of the deprivation domains of income by the linear regression and  
41 education by the maximization algorithm can barely be reconciled with existing evidence  
42 regarding the positive relationship of these two deprivation domains and mortality [44, 45].  
43  
44 The high weighting of the employment deprivation domain (49%) by the algorithm,  
45 concerning mortality, could reflect the high relevance of unemployment relating to premature  
46 mortality.  
47  
48  
49  
50  
51  
52  
53

### 54 **Relationship of the GIMD versions and mortality**

55  
56 Throughout the analysis, we could not find a weighting method that could be seen as superior  
57 compared with the other approaches or could even be recommended as a gold standard. Even  
58  
59  
60

1  
2  
3 though almost all GIMD weighting approaches differed significantly in their correlation with  
4 mortality, using only significance as a method of evaluation for the approaches seemed  
5 inappropriate. The correlation coefficient between the different GIMD versions was already  
6 very high ( $\rho > 0.89$ ), so that even small non-relevant differences could have produced  
7 significant results. All correlations of the GIMD versions with mortality were highly  
8 significant and showed rather small differences in respect to absolute values ( $\rho$  between 0.54  
9 and 0.62). Since we conducted multiple paired t-tests, type-1 error inflation was present. In an  
10 additional analysis we corrected for multiple testing with Benjamini et al. adjustment [46].  
11 When we corrected for the correlation of the GIMD versions with mortality, the significance  
12 of the results did not change (Table 4). When we corrected for the multiple comparison of the  
13 difference of the correlation between the GIMD-versions (Table 5), there was a slight  
14 difference present in the significance (Supplement 5).

15  
16  
17  
18  
19  
20  
21  
22  
23  
24  
25  
26  
27  
28  
29  
30  
31  
32  
33  
34  
35  
36  
37  
38  
39  
40  
41  
42  
43  
44  
45  
46  
47  
48  
49  
50  
51  
52  
53  
54  
55  
56  
57  
58  
59  
60  
The empirical weighting of the GIMD by an exploratory factor analysis represented an  
adequate alternative to the theory-based weighting of the domains, on account of the simple  
operability and the highly significant association of this GIMD version with mortality.  
Thereby, a general applicability of the GIMD for the analysis of implications for other health  
outcomes can be ensured, and the results of different datasets can be compared by model fit  
measures [25]. Despite the significant correlation, the application of equal weighting of the  
domains could be considered as obsolete, as this would produce an implicit weighting of the  
domains depending on the availability of indicators for each domain [6].

### Strengths and limitations of the study

Using a multi-methodological strategy, we were able to cover a broad bandwidth of weighting  
approaches. As there seems to be no gold standard for weighting of deprivation indices, we  
recommend that sensitivity testing of the GIMD is particularly important. An equal weighting

1  
2  
3 as well as an exploratory factor analysis for the weighting of multiple deprivation domains  
4 were carried out in this study for the first time. A factor analysis of the IMD domains was  
5 advised by Deas et al. [26], but has not been implemented to date. Furthermore, we provided  
6 an outcome-specific weighting approach in the form of a greedy maximization algorithm: this  
7 method produced a domain weighting of the GIMD that maximized a specific measure  
8 concerning one health outcome (in this case, the correlation between GIMD and mortality). A  
9 transfer of the algorithm to other areas of interest is possible without difficulty but should be  
10 used mainly for orientation, which is possible concerning a selected measure, given a dataset.

11  
12 Limitations of the study concerned the selection of weighting methods such as the revealed  
13 preferences or Bayesian factor analysis (cf. Table 1), which resulted from restricted data  
14 access at a regional level. Empirical methods are always data dependent and are restricted  
15 concerning a possible comparison over time, especially with the use of cross-sectional data.  
16 This could be addressed by using longitudinal data and would enable us to measure ‘between  
17 variation’ (i.e. over different locations) to ‘within variation’ (i.e. the same location over time).

18  
19 Using correlation coefficients to evaluate the association between different GIMD versions  
20 and mortality does not necessarily imply a causal association between area deprivation and  
21 mortality. Additionally, overfitting is present by using the greedy algorithm as a weighting  
22 approach, since it already yields the weights for the maximum correlation between the GIMD  
23 and mortality. However, there is reliability of using the GIMD to evaluate total and premature  
24 mortality, since the correlation between the GIMD and mortality is very stable over time  
25 (GIMD scores from 2006 and 2010 yield very similar correlations with mortality). Another  
26 point was the lack of literature regarding the application of different weighting procedures.  
27 This limitation could partly be counterbalanced with the input of expert interviews. With  
28 regard to the linear regression, the selection of the deprivation proxy should be reconsidered  
29 ex post, as the use of the deprivation measure regarding living space per inhabitant showed a

1  
2  
3 rather weak (yet significant) positive correlation with overall deprivation  
4  
5 ( $\rho = 0.35$ ). This could be explained by the idea that, in less deprived cities such as Hamburg  
6  
7 and Munich, there can be – in general – less available living space because of a very  
8  
9 competitive housing market. So, there could be a partial negative correlation between  
10  
11 deprivation regarding available living space and overall deprivation in some areas.  
12  
13 Unfortunately, multidimensional proxies at district level were not available for Germany. We  
14  
15 tested other measures like the overall Gross Domestic Product (GDP) per district and the GDP  
16  
17 per employed persons per district. They had a similar or lower correlation with the original  
18  
19 GIMD as the living space variable, but using them had some major drawbacks. We  
20  
21 understand, that the use of a one-dimensional proxy is a limitation in our work. However,  
22  
23 given the very restricted variety of appropriate variables at the district level in Germany, the  
24  
25 selection of this proxy was a pragmatic approach to test a weighting approach based on a  
26  
27 linear regression.  
28  
29  
30  
31  
32  
33  
34  
35  
36

## 37 **Conclusion**

38  
39 The variation in the domain weights of the GIMD did not have a large measurable impact on  
40  
41 the relationship between area deprivation and mortality. The correlation between the GIMD  
42  
43 and both total mortality and premature mortality proved to be very stable, regardless of the  
44  
45 application of the different weighting approaches and the resulting different sets of domain  
46  
47 weights. The GIMD versions produced relatively stable results with regard to the central  
48  
49 distribution measures of the overall scores (Table 3).  
50  
51

52  
53 The theory-based weighting of Maier et al. can be interpreted ex post as more conservative  
54  
55 than the empirical weighting approaches, as the weighting of the income and employment  
56  
57 domains is relatively strong at 50% in contrast to the empirical methods. Nevertheless, a  
58  
59 theory-based selection of domains seems to be more meaningful than an empirically based  
60

1  
2  
3 selection because the results of the empirical methods are restricted, as discussed above. The  
4 stability with respect to the scores and the relationship to mortality support this advice. A  
5 modelling of the GIMD with a confirmatory factor analysis could be considered as a  
6 promising empirical approach with the prospect of temporal comparability in future studies.  
7  
8  
9  
10  
11  
12  
13  
14  
15

### 16 **Competing interests**

17  
18 No competing interests to declare.  
19  
20  
21  
22  
23

### 24 **Data sharing statement**

25  
26 Extra data regarding the GIMD is available by emailing Werner Maier  
27 (werner.maier@helmholtz-muenchen.de).  
28  
29  
30

### 31 **Funding statement**

32  
33 This study received no specific grant from any funding agency in the public, commercial or  
34 not-for-profit sectors.  
35  
36  
37  
38  
39  
40  
41

### 42 **Contributorship statement**

43  
44  
45 FS and WM designed the study. FS performed the analysis and wrote the initial version of the  
46 manuscript. CK gave statistical advice, provided the greedy maximization algorithm and gave  
47 support preparing the manuscript. WM provided the German Index of Multiple Deprivation  
48 (GIMD), supervised the study and gave support preparing the manuscript. JF advised on  
49 deprivation indices and gave support preparing the manuscript. All authors read and approved  
50 the final manuscript.  
51  
52  
53  
54  
55  
56  
57  
58  
59  
60

**What is already known on this subject**

Indices of Multiple Deprivation are weighted according to theoretical deliberations about deprivation and expert consultations. Several alternative weighting methods for deprivation indices are available. However, evidence is scarce regarding the comparison of these weighting approaches.

**What this study adds**

- Different weighting approaches were applied to the domains of the German Index of Multiple Deprivation (GIMD). The resulting GIMD versions were compared regarding to the domain weights and the association of these indices with mortality.
- The association of the differently weighted GIMD versions with mortality proved to be very stable, regardless of the weighting approach. However, theory-based weighting of the domains provides a good standard.

## Manuscript References

- 1 Mackenbach JP, Kunst AE, Cavelaars AE, *et al.* Socioeconomic inequalities in morbidity and mortality in western Europe. The EU Working Group on Socioeconomic Inequalities in Health. *Lancet (London, England)* 1997;**349**:1655-9.
- 2 Voigtlander S, Berger U, Razum O. The impact of regional and neighbourhood deprivation on physical health in Germany: a multilevel study. *BMC Public Health* 2010;**10**:403.
- 3 Siegel M, Mielck A, Maier W. Individual Income, Area Deprivation, and Health: Do Income-Related Health Inequalities Vary by Small Area Deprivation? *Health economics* 2015;**24**:1523-30.
- 4 Zhang X, Cook PA, Lisboa PJ, *et al.* The effects of deprivation and relative deprivation on self-reported morbidity in England: an area-level ecological study. *Int J Health Geogr* 2013;**12**:5.
- 5 Allender S, Scarborough P, Keegan T, *et al.* Relative deprivation between neighbouring wards is predictive of coronary heart disease mortality after adjustment for absolute deprivation of wards. *J Epidemiol Community Health*. 2012 Sep;**66**(9):803-8. doi: 10.1136/jech.2010.116723.
- 6 Noble M, Wright G, Smith G, *et al.* Measuring Multiple Deprivation at the Small-Area Level. *Environment and Planning A* 2006;**38**:169-85.
- 7 Maier W, Fairburn J, Mielck A. Regional deprivation and mortality in Bavaria. Development of a community-based index of multiple deprivation. *Gesundheitswesen* 2012;**74**:416-25.
- 8 Maier W, Holle R, Hunger M, *et al.* The impact of regional deprivation and individual socio-economic status on the prevalence of Type 2 diabetes in Germany. A pooled analysis of five population-based studies. *Diabet Med* 2013;**30**:e78-86.
- 9 Maier W, Scheidt-Nave C, Holle R, *et al.* Area Level Deprivation Is an Independent Determinant of Prevalent Type 2 Diabetes and Obesity at the National Level in Germany. Results from the National Telephone Health Interview Surveys 'German Health Update' GEDA 2009 and 2010. *Plos One* 2014;**9**:e89661.
- 10 Schäfer T, Pritzkeleit R, Jeszenszky C, *et al.* Trends and geographical variation of primary hip and knee joint replacement in Germany. *Osteoarthritis Cartilage* 2013;**21**:279-88.
- 11 Jansen L, Eberle A, Emrich K, *et al.* Socioeconomic deprivation and cancer survival in Germany: an ecological analysis in 200 districts in Germany. *Int J Cancer* 2014;**134**:2951-60.
- 12 Smith T, Noble M, Noble S, *et al.* The English Indices of Deprivation 2015. *London: Department for Communities and Local Government* 2015.
- 13 Dibben C, Atherton I, Cox M, *et al.* Investigating the impact of changing the weights that underpin the Index of Multiple Deprivation 2004. *London: Department for Communities and Local Government* 2007.

- 1  
2  
3 14 Fairburn J, Maier W, Braubach M. Incorporating Environmental Justice into Second  
4 Generation Indices of Multiple Deprivation: Lessons from the UK and Progress  
5 Internationally. *International Journal of Environmental Research and Public Health*  
6 2016;**13**:750.  
7  
8  
9 15 Cabrera-Barona, P., Murphy, T., Kienberger, S. & Blaschke, T. (2015) A multi-criteria  
10 spatial deprivation index to support health inequality analyses. *International Journal of*  
11 *Health Geographics*, 14(11).  
12  
13 16 Pampalon R, Hamel D, Gamache P, *et al.* A deprivation index for health planning in  
14 Canada. *Chronic diseases in Canada* 2009;**29**:178-91.  
15  
16  
17 17 Bauer H, Maier W. GIMD 2010 – Ein Update des ‚German Index of Multiple  
18 Deprivation‘. *Berichte des Helmholtz Zentrums München* (2018), doi:10.15134/2018M0001.  
19 [cited 2018 December 4]. Available from: [https://push-zb.helmholtz-](https://push-zb.helmholtz-muenchen.de/frontdoor.php?source_opus=54124&la=de)  
20 [muenchen.de/frontdoor.php?source\\_opus=54124&la=de](https://push-zb.helmholtz-muenchen.de/frontdoor.php?source_opus=54124&la=de).  
21  
22  
23 18 Statistische Ämter des Bundes und der Länder [Internet]. The Regional Database  
24 Germany. c2016. [cited 2017 June 25]. Available from:  
25 <https://www.regionalstatistik.de/genesis/online/>.  
26  
27  
28 19 Gregory IN. Comparisons between geographies of mortality and deprivation from the  
29 1900s and 2001: spatial analysis of census and mortality statistics . *BMJ* 2009 ; 339 : b3454  
30  
31 20 Folwell K. Single measures of deprivation. *J Epidemiol Community Health* 1995;**49 Suppl**  
32 **2**:S51-S56.  
33  
34 21 Gordon D. Census based deprivation indices: their weighting and validation. *Journal of*  
35 *Epidemiology and Community Health* 1995;**49**:S39-S44.  
36  
37  
38 22 Haase T, Pratschke J. The 2011 Pobal HP Deprivation Index for Small Areas (SA):  
39 Introduction and Reference Tables. Pobal 2012.  
40  
41 23 Haase T, Pratschke J. Deprivation and its Spatial Articulation in the Republic of Ireland.  
42 *Dublin: Area Development Management* 2005.  
43  
44 24 Mari-Dell'Olmo M, Martinez-Beneito MA, Borrell C, *et al.* Bayesian factor analysis to  
45 calculate a deprivation index and its uncertainty. *Epidemiology* 2011;**22**:356-64.  
46  
47  
48 25 Thompson B. *Exploratory and confirmatory factor analysis: Understanding concepts and*  
49 *applications*: American Psychological Association 2004.  
50  
51 26 Deas I, Robson B, Wong C, *et al.* Measuring Neighbourhood Deprivation: A Critique of  
52 the Index of Multiple Deprivation. *Environment and Planning C: Government and Policy*  
53 2003;**21**:883-903.  
54  
55  
56 27 Slachtova H, Tomaskova H, Splichalova A, *et al.* Czech socio-economic deprivation index  
57 and its correlation with mortality data. *Int J Public Health* 2009;**54**:267-73.  
58  
59  
60



- 1  
2  
3 28 Jarman B. Underprivileged areas: validation and distribution of scores. *Br Med J (Clin Res Ed)* 1984;**289**:1587-92.  
4  
5  
6  
7 29 Meijer M, Engholm G, Grittner U, *et al.* A socioeconomic deprivation index for small  
8 areas in Denmark. *Scand J Public Health* 2013;**41**:560-9.  
9  
10 30 Testi A, Ivaldi E. Material versus social deprivation and health: a case study of an urban  
11 area. *Eur J Health Econ* 2009;**10**:323-8.  
12  
13 31 Haase T, Pratschke J, Gleeson J. All-Island Deprivation Index: Towards the development  
14 of consistent deprivation measures for the island of Ireland. *BORDERLANDS – The Journal*  
15 *of Spatial Planning in Ireland* 2012;**2**.  
16  
17  
18 32 Carstairs V, Morris R. Deprivation and health in Scotland. *Health Bull (Edinb)*. 1990  
19 Jul;**48**(4):162-75.  
20  
21 33 Townsend P, Phillimore P, Beattie A. Health and Deprivation: inequality and the North  
22 (London, Croom Helm). *Links* 1988.  
23  
24  
25 34. Atkinson J, Salmond C, Crampton P. NZDep2013 Index of Deprivation. c2014. [cited  
26 2018 June 11]. Available from: <https://www.otago.ac.nz/wellington/otago069936.pdf>.  
27  
28  
29 35. Boarini R, d’Ercole MM, Measures of Material Deprivation in OECD Countries. c2006.  
30 [cited 2018 June 11]. Available from: <http://www.oecd.org/social/soc/37223552.pdf>  
31  
32 36. Eurostat. Housing conditions. c2017. [cited 2018 June 11]. Available from:  
33 [http://ec.europa.eu/eurostat/statistics-](http://ec.europa.eu/eurostat/statistics-explained/index.php/Housing_conditions#Housing_quality.C2.A0.E2.80.94.C2.A0overcrowding)  
34 [explained/index.php/Housing\\_conditions#Housing\\_quality.C2.A0.E2.80.94.C2.A0overcrowding](http://ec.europa.eu/eurostat/statistics-explained/index.php/Housing_conditions#Housing_quality.C2.A0.E2.80.94.C2.A0overcrowding)  
35  
36  
37 37 Ivaldi E, Testi A. Genoa Index of Deprivation (GDI): An index of material deprivation for  
38 geographical areas. *Social Indicators: Statistics, Trends and Policy Development* 2010:75.  
39  
40  
41 38 Pernet C, Delpierre C, Dejardin O *et al.* Construction of an adaptable European  
42 transnational ecological deprivation index: The French version. *Journal of epidemiology and*  
43 *community health* 2012; **66**: 982-989.  
44  
45  
46 39 Kurz C, Maier W, Rink C. A greedy stacking algorithm for model ensembling and  
47 domain weighting. *Currently under review*.  
48  
49 40 Brown TA. *Confirmatory Factor Analysis for Applied Research*. New York: The Guilford  
50 Press 2006.  
51  
52 41 Hollander M, Wolfe DA. *Nonparametric statistical methods*. 1973.  
53  
54 42 Williams EJ. *Regression analysis*: wiley New York 1959.  
55  
56 43 Team RC. *R: a language and environment for statistical computing*. Vienna, Austria;  
57 2015.  
58  
59  
60

1  
2  
3 44 Cutler D, Deaton A, Lleras-Muney A. The determinants of mortality. *The Journal of*  
4 *Economic Perspectives* 2006;**20**:97-120.

5  
6  
7 45 Wolfson MC, Kaplan G, Lynch J, *et al.* Relation between income inequality and mortality:  
8 empirical demonstration. *Western J Med* 2000;**172**:22-4.

9  
10 46 Benjamini, Y., and Yekutieli, D. (2001). The control of the false discovery rate in multiple  
11 testing under dependency. *Annals of Statistics* 29, 1165--1188.

12  
13 47 Hlavac M. stargazer: Well-Formatted Regression and Summary Statistics Tables. R  
14 package version 5.2. 2015.

15  
16  
17  
18  
19  
20  
21  
22  
23  
24  
25  
26  
27  
28  
29  
30  
31  
32  
33  
34  
35  
36  
37  
38  
39  
40  
41  
42  
43  
44  
45  
46  
47  
48  
49  
50  
51  
52  
53  
54  
55  
56  
57  
58  
59  
60

For peer review only

## SUPPLEMENT

Supplement 1: Weighting of the domains and use of indicators from the ‘German Index of Multiple Deprivation’ (GIMD).

| <b>Domains</b>                       | <b>Domain weight (%)</b> | <b>Indicators (reference)</b>                                                                                           |
|--------------------------------------|--------------------------|-------------------------------------------------------------------------------------------------------------------------|
| <b>Income deprivation</b>            | 25                       | - Total earnings<br>(Number of Taxpayers)                                                                               |
| <b>Employment deprivation</b>        | 25                       | - Total number of unemployed<br>(Population, 15 to 65 years)                                                            |
| <b>Educational deprivation</b>       | 15                       | - Persons without vocational training<br>(Employees subject to social security contributions at the place of residence) |
| <b>Municipal revenue deprivation</b> | 15                       | - Tax revenue of municipalities<br>(Total population)                                                                   |
| <b>Social capital deprivation</b>    | 10                       | - Migration balance*<br>(Total population)<br>- Electoral participation in %<br>(Federal parliament)                    |
| <b>Environment deprivation</b>       | 5                        | - Commercial, industrial and traffic areas **<br>(Total area)                                                           |
| <b>Security deprivation</b>          | 5                        | - Number of road accidents(Total population)<br>- Number of crimes(Total population)                                    |

\* People moving into a municipality or a district minus people leaving a municipality or a district.

\*\* Indicator for soil sealing.

1  
2  
3 Supplement 2: Calculation of the standardized mortality rates (SMR):  
4  
5

6 1. SMR 'total mortality' per district = total deaths per district / expected total deaths per  
7 district  
8  
9

10  
11 2. Expected total deaths per district = total population size per district \* total mortality rate  
12 per 100,000 per district / 100,000  
13  
14

15  
16 3. Total mortality rate per 100,000 per district = total deaths per district/total population size  
17 per district\*100,000  
18  
19

20  
21  
22 4. SMR 'premature mortality' per district = premature (before 65 years) deaths per district /  
23 expected premature (before 65 years) deaths per district  
24  
25

26  
27 5. Expected premature deaths per district = premature population size per district \* premature  
28 mortality rate per 100,000 per district / 100,000  
29  
30

31  
32 6. Premature mortality rate per 100,000 per district = premature deaths per district/premature  
33 population size per district\*100,000  
34  
35  
36  
37  
38  
39  
40  
41  
42  
43  
44  
45  
46  
47  
48  
49  
50  
51  
52  
53  
54  
55  
56  
57  
58  
59  
60

Supplement 3: Results of a linear regression: Outcome: deprivation proxy, Covariables: domains of the GIMD10.

Deprivation of living space = Income + Employment + Education + Municipal Income + Social Capital + Environment + Security

---



---

**Coefficients (Robust Standard Errors in Parenthesis)**

|                  |                      |
|------------------|----------------------|
| Income           | 0.014<br>(0.051)     |
| Employment       | 0.067*<br>(0.029)    |
| Education        | -0.048*<br>(0.023)   |
| Municipal income | -0.094***<br>(0.025) |
| Social capital   | 0.035**<br>(0.014)   |
| Environment      | 0.045***<br>(0.011)  |
| Security         | -0.006<br>(0.008)    |

---

**Model**

R-squared = 0.34

adj. R-squared = 0.33

F = 30.01

p < 0.001

Log-likelihood = -1050.76

Deviance = 3959.74

AIC = 2117.52

BIC = 2149.69

N = 412

---



---

1  
2  
3 \*\*\*  $p < 0.001$ ; \*\*  $p < 0.01$ ; \*  $p < 0.05$ ; n.s. not significant  
4  
5

6 Source: R-Output, regression results conducted with R-package 'stargazer' [47].

7 → All domains have a significant effect on the proxy, except security and Income

8 → Overall model explains the variance of living space deprivation significantly,  $R^2 = 0.34$   
9  
10  
11  
12  
13  
14  
15  
16  
17  
18  
19  
20  
21  
22  
23  
24  
25  
26  
27  
28  
29  
30  
31  
32  
33  
34  
35  
36  
37  
38  
39  
40  
41  
42  
43  
44  
45  
46  
47  
48  
49  
50  
51  
52  
53  
54  
55  
56  
57  
58  
59  
60

For peer review only

Supplement 4: Results of an exploratory factor analysis of the deprivation domains with the extraction of one factor, method = principal axis factor analysis.

| Standardized loadings | Factor 1 | Communality ( $u^2$ ) | Specific variance ( $1 - u^2$ ) |
|-----------------------|----------|-----------------------|---------------------------------|
| Income                | 0.92     | 0.85                  | 0.15                            |
| Employment            | 0.76     | 0.58                  | 0.42                            |
| Education             | -0.36    | 0.13                  | 0.87                            |
| Municipal income      | 0.87     | 0.75                  | 0.25                            |
| Social capital        | 0.80     | 0.64                  | 0.36                            |
| Environment           | -0.23    | 0.06                  | 0.94                            |
| Security              | -0.05    | 0.01                  | 0.99                            |

| Model                                           | Factor 1 |
|-------------------------------------------------|----------|
| Variance, explained by the factor (SS loadings) | 3.01     |
| Proportion of total variance                    | 0.43     |

| Model fit measures                          |                        |
|---------------------------------------------|------------------------|
| Root mean square of the residuals (RMSR)    | 0.17                   |
| Likelihood chi square                       | 584.65 ( $p < 0.001$ ) |
| Tucker–Lewis index of factoring reliability | 0.50                   |
| RMSEA index (confidence interval)           | 0.32 ([0.30; 0.34])    |
| BIC                                         | 500.35                 |

Source: Tables output from R and own presentation

Supplement 5: Corrected Test<sup>1</sup> of the differences in the Spearman correlation coefficients for the relationship of the GIMD<sup>2</sup> versions and both total and premature mortality.

| Total mortality<br>(all age groups) | Original<br>weighting  | Equal<br>weighting | Linear<br>regression  | Maximization<br>algorithm | Factor<br>analysis     |
|-------------------------------------|------------------------|--------------------|-----------------------|---------------------------|------------------------|
| Original weighting                  | 0                      | 0.043*             | 0.014 <sup>n.s.</sup> | -0.037**                  | -0.020*                |
| Equal weighting                     | -0.043*                | 0                  | -0.029*               | -0.080***                 | -0.064**               |
| Linear regression                   | -0.014 <sup>n.s.</sup> | 0.029*             | 0                     | -0.051 ***                | -0.034*                |
| Maximization<br>algorithm           | 0.037**                | 0.080**            | 0.051**               | 0                         | 0.016*                 |
| Factor analysis                     | 0.020*                 | 0.064**            | 0.034*                | -0.016 *                  | 0                      |
| Premature mortality<br>(< 65 years) |                        |                    |                       |                           |                        |
| Original weighting                  | 0                      | 0.068***           | 0.028***              | -0.065***                 | -0.005 <sup>n.s.</sup> |
| Equal weighting                     | -0.068***              | 0                  | -0.040**              | -0.133***                 | -0.073***              |
| Linear regression                   | -0.028***              | -0.040**           | 0                     | -0.094 ***                | -0.034***              |
| Maximization<br>algorithm           | 0.065***               | 0.133***           | 0.094 ***             | 0                         | 0.060***               |
| Factor analysis                     | 0.005 <sup>n.s.</sup>  | 0.073***           | 0.034***              | -0.060***                 | 0                      |

\*\*\* p < 0.001; \*\* p < 0.01; \* p < 0.05; n.s. not significant

<sup>1</sup> Test of the significance of the differences with Williams's t-test for paired correlations

<sup>2</sup> GIMD: German Index of Multiple Deprivation

**Original weighting:** Spearman correlation between GIMD (weighting according to Maier et al. [8]) and both total and premature mortality;

**Equal weighting:** Spearman correlation between GIMD (domains equally weighted) and both total and premature mortality;

**Linear regression:** Spearman correlation between GIMD (weighting of the domains with regression



1  
2  
3 coefficients with a deprivation proxy as dependent and domains as independent variables) and both total and  
4  
5 premature mortality;

6  
7 **Maximization algorithm:** Spearman correlation between GIMD (weighting of the domains for the maximum  
8  
9 Spearman correlation between overall index and mortality) and both total and premature mortality;

10  
11 **Factor analysis:** Spearman correlation between GIMD (weighting of the domains with loadings from principal  
12  
13 axis factoring) and both total and premature mortality.  
14  
15  
16  
17  
18  
19  
20  
21  
22  
23  
24  
25  
26  
27  
28  
29  
30  
31  
32  
33  
34  
35  
36  
37  
38  
39  
40  
41  
42  
43  
44  
45  
46  
47  
48  
49  
50  
51  
52  
53  
54  
55  
56  
57  
58  
59  
60

For peer review only

Supplement 6: Working steps of the greedy weighting algorithm.

- The vector P containing the greedy solution of the non-normalized weighted sum in each step is initialized with zero elements.
- All column weights and the total number of weights are also initialized to zero. In each iteration, first, the total number of weights is incremented.
- Then, all sums of P with a column of X are normalized by the total number of weights and evaluated separately on the evaluation metric (correlation).
- The column corresponding to the highest value is assigned one weight factor and added to P. This procedure is repeated 100 times.
- The algorithm returns a vector of length N, with the number of columns of X, containing weights for each column, summing to 1.

# BMJ Open

**Do alternative weighting approaches for an Index of Multiple Deprivation change the association with mortality?  
A sensitivity analysis from Germany.**

|                                 |                                                                                                                                                                                                                                                                                                                                                                                                                                                                                                           |
|---------------------------------|-----------------------------------------------------------------------------------------------------------------------------------------------------------------------------------------------------------------------------------------------------------------------------------------------------------------------------------------------------------------------------------------------------------------------------------------------------------------------------------------------------------|
| Journal:                        | <i>BMJ Open</i>                                                                                                                                                                                                                                                                                                                                                                                                                                                                                           |
| Manuscript ID                   | bmjopen-2018-028553.R1                                                                                                                                                                                                                                                                                                                                                                                                                                                                                    |
| Article Type:                   | Research                                                                                                                                                                                                                                                                                                                                                                                                                                                                                                  |
| Date Submitted by the Author:   | 11-Apr-2019                                                                                                                                                                                                                                                                                                                                                                                                                                                                                               |
| Complete List of Authors:       | Schederecker, Florian; Helmholtz Zentrum München (GmbH), Institute of Health Economics and Health Care Management<br>Kurz, Christoph; Helmholtz Zentrum Munchen Deutsches Forschungszentrum für Umwelt und Gesundheit, Institute of Health Economics and Health Care Management<br>Fairburn, Jon; Staffordshire University, Business School<br>Maier, Werner; German Research Center for Environmental Health (GmbH), Institute of Health Economics and Health Care Management, Helmholtz Zentrum München |
| <b>Primary Subject Heading</b>: | Public health                                                                                                                                                                                                                                                                                                                                                                                                                                                                                             |
| Secondary Subject Heading:      | Epidemiology                                                                                                                                                                                                                                                                                                                                                                                                                                                                                              |
| Keywords:                       | Area deprivation, German Index of Multiple Deprivation, domains, weighting, mortality                                                                                                                                                                                                                                                                                                                                                                                                                     |
|                                 |                                                                                                                                                                                                                                                                                                                                                                                                                                                                                                           |

SCHOLARONE™  
Manuscripts

1  
2  
3  
4  
5  
6  
7  
8  
9  
10  
11  
12  
13  
14  
15  
16  
17  
18  
19  
20  
21  
22  
23  
24  
25  
26  
27  
28  
29  
30  
31  
32  
33  
34  
35  
36  
37  
38  
39  
40  
41  
42  
43  
44  
45  
46  
47  
48  
49  
50  
51  
52  
53  
54  
55  
56  
57  
58  
59  
60

# Do alternative weighting approaches for an Index of Multiple Deprivation change the association with mortality? A sensitivity analysis from Germany.

Florian Schederecker <sup>1,2</sup>, Christoph Kurz <sup>1,4</sup>, Jon Fairburn <sup>3</sup>, Werner Maier <sup>1,4</sup>

<sup>1</sup> Institute of Health Economics and Health Care Management, Helmholtz Zentrum München (GmbH), Neuherberg, Germany

<sup>2</sup> IBE – Institute for Medical Information Processing, Biometry and Epidemiology, LMU Munich, Germany

<sup>3</sup> Business School, Staffordshire University, UK

<sup>4</sup> German Center for Diabetes Research (DZD), Neuherberg, Germany

**Corresponding Author:** Dr. Werner Maier

**Postal Address:** Helmholtz Zentrum München (GmbH), Institute of Health Economics and Health Care Management, Ingolstädter Landstr. 1, D-85764 Neuherberg, Germany

**Email:** [werner.maier@helmholtz-muenchen.de](mailto:werner.maier@helmholtz-muenchen.de)

**Telephone Number:** 0049-89-3187-4187

## ABSTRACT

### Objectives:

This study aimed to assess the impact of using different weighting procedures for the German Index of Multiple Deprivation (GIMD) investigating their link to mortality rates.

**Design and setting:** In addition to the original (normative) weighting of the GIMD domains, four alternative weighting approaches were applied: equal weighting, linear regression, maximization algorithm and factor analysis. Correlation analyses to quantify the association between the differently weighted GIMD versions and mortality based on district-level official data from Germany in 2010 were applied (N=412 districts).

**Outcome measures:** Total mortality (all age groups) and premature mortality (< 65 years).

**Results:** All correlations of the GIMD versions with both total and premature mortality were highly significant ( $p < 0.001$ ). The comparison of these associations using Williams's t-test for paired correlations showed significant differences, which proved to be small in respect to absolute values of Spearman's rho (total mortality: between 0.535 and 0.615; premature mortality: between 0.699 and 0.832).

**Conclusions:** The association between area deprivation and mortality proved to be stable, regardless of different weighting of the GIMD domains. The theory-based weighting of the GIMD should be maintained, due to the stability of the GIMD scores and the relationship to mortality.

**Keywords:** Area deprivation, German Index of Multiple Deprivation, domains, weighting, mortality

## STRENGTHS AND LIMITATIONS OF THIS STUDY

- There is only limited literature on the application of different weighting approaches of deprivation indices – this study adds to that body of work.
- Our study provides an overview of established weighting approaches for deprivation indices used in Europe.
- Sensitivity testing of deprivation indices is particularly important as there seems to be no gold standard.
- We compare a broad range of normative and empirical weighting approaches for the domains of an Index of Multiple Deprivation.
- Limitations of the study concern the selection of weighting methods resulting from restricted data access at regional level.

## INTRODUCTION

Indices of deprivation are increasingly being used to investigate health and, in some countries, as tools of public policy [1-5]. Therefore, it is important that these indices are transparent and rigorous in their construction so that confidence and understanding in their use are maintained.

In the 2000s, a series of deprivation indices with a multidimensional structure were introduced in the UK. These ‘Indices of Multiple Deprivation’ (IMDs) have been updated regularly ever since [6]. The domains of deprivation were identified from the literature and were a result of the availability of data at the time. A key aspect to consider when constructing such indices is the weighting and consolidation of the different deprivation domains that produce the final overall index.

1  
2  
3 Transparency and availability of data used in the indices mean that indicators and weightings  
4 can be adapted to particular demands by researchers. Adaptation may be needed, for example  
5  
6 to prevent autocorrelation effects where a component of the index is also related to the  
7  
8 independent variable under consideration.  
9  
10

11  
12  
13 An IMD for Germany has been developed based on the methodology according to Noble et  
14  
15 al. [6]. It was first applied in the German federal state of Bavaria ('Bavarian Index of  
16  
17 Multiple Deprivation', BIMD) and subsequently as a nationwide IMD ('German Index of  
18  
19 Multiple Deprivation', GIMD) [7, 8]. For the construction of the German deprivation indices,  
20  
21 domains from the British IMDs were partly used (e.g. income and employment), and  
22  
23 additional domains for social capital and municipal revenue were introduced. The GIMD  
24  
25 includes both aspects, material deprivation (e.g. income) as well as social deprivation (e.g.  
26  
27 social capital).  
28  
29  
30

31  
32 The GIMD has been used repeatedly for analyses regarding the relationship between area  
33  
34 deprivation and morbidity, mortality and health care provision in Germany, and a persistent  
35  
36 positive association has been shown between area deprivation and health outcomes [9-11].  
37  
38

39  
40 One crucial point in building IMDs involves the weighting of the different deprivation  
41  
42 domains. So far, weightings of IMDs have been conducted mainly by analysing literature on  
43  
44 multiple deprivation and based on expert consultation [12]. Regarding the domain weights of  
45  
46 the English IMD, alternative empirical weightings were carried out by C. Dibben, which led  
47  
48 to a recommendation of adjustment of the weights [13]. However, this did not yield an  
49  
50 alteration in the weighting of subsequent IMDs, as user surveys 'did not reveal significant  
51  
52 support for moving to new weights' [12], and consisted only of two different empirical  
53  
54 methods.  
55  
56  
57  
58  
59  
60

1  
2  
3 Besides the IMDs in the UK and Germany, several alternative approaches to the development  
4 and weighting of deprivation indices have been developed in other European countries [14]  
5 as well as non-European countries [15, 16]. These approaches consist of a variety of  
6 (empirical) weighting approaches, which have not been applied to the British IMDs.  
7  
8 However, it seems that almost all the approaches to weight deprivation indices are based on  
9 single methods, and sensitivity analysis regarding the application of different methods to a  
10 specific deprivation index has not been done. Additionally, literature regarding the  
11 application of different weighting procedures to a deprivation index is lacking.  
12  
13

14  
15 As the GIMD was weighted by experts following the model of the British IMDs, we  
16 conducted a sensitivity analysis for the domain weighting of the GIMD following the  
17 example of Dibben et al. [13]. The aim of this study was to test the stability of the GIMD to  
18 different weighting approaches by conducting correlation analyses with mortality as a key  
19 health outcome. We decided to examine several alternative weighting approaches for the  
20 domains of the GIMD by stepwise comparison:  
21  
22

- 23 1. From a literature review, we obtain an overview of weighting approaches for deprivation  
24 indices in Europe and select methods that can be used for alternative weighting approaches to  
25 the domains of the GIMD.  
26  
27
- 28 2. Regarding the weighting of the domains and the distribution of the GIMD scores, we  
29 analyse the results of the different weighting approaches and compare them with each other.  
30  
31
- 32 3. We compare the associations of these new versions of the GIMD with total mortality (all  
33 age groups) and premature mortality in Germany (< 65 years) in order to conduct a sensitivity  
34 analysis concerning the different approaches.  
35  
36
- 37 4. Finally, we identify the weighting set that maximizes the association between the GIMD  
38 and mortality.  
39  
40  
41  
42  
43  
44  
45  
46  
47  
48  
49  
50  
51  
52  
53  
54  
55  
56  
57  
58  
59  
60



1  
2  
3 A conceptual distinction between the different weighting methods was established with the  
4  
5 identification of normative and empirically based approaches.  
6  
7  
8  
9

## 10 11 **METHODS**

### 12 13 14 **Data for the statistical analysis**

15  
16 In order to construct different GIMD versions using alternative weighting approaches, we  
17  
18 used regional data from the original GIMD from 2010 (GIMD 2010) for the domain and  
19  
20 composite scores of the 412 districts in Germany [17]. For the construction of the original  
21  
22 GIMD, Maier et al. standardized nine deprivation indicators and assigned them to seven  
23  
24 deprivation domains, which represent different dimensions of deprivation: income,  
25  
26 employment, education, environment, security, municipal revenue and social capital  
27  
28 (Supplement 1). Each district is provided with a deprivation score for every single domain.  
29  
30 The domain score is a statistical measure for the extent of area deprivation in a regional unit.  
31  
32 The higher the deprivation within a district, the higher the domain score for the district.  
33  
34 Subsequently, the domain scores are weighted based on a theoretical foundation and expert  
35  
36 consultation and summed for an overall deprivation score for every district. For further  
37  
38 details, see Maier et al. [7, 17].  
39  
40  
41  
42  
43  
44

45  
46 Regarding an analysis of the relationship between area deprivation and both total mortality  
47  
48 and premature mortality, we used raw mortality data and population data from 2010 at the  
49  
50 district level, derived from the German Federal Statistical Office [18]. The districts were  
51  
52 identified by official district code numbers. Using the mortality and population data, we  
53  
54 indirectly calculated standardized mortality rates (SMRs) for both total mortality (SMR  
55  
56 ‘total’) as well as premature mortality (SMR ‘premature’). This was necessary to compare  
57  
58  
59  
60

1  
2  
3 districts because of their highly varying population size [19]. For details on the calculation of  
4  
5 the SMR see Supplement 2.  
6  
7

8 We used the variable ‘available living space per inhabitant’ from the German Federal  
9  
10 Statistical Office from 2010 [18] as a proxy of deprivation. We reversed the polarity of its  
11  
12 values and thus make it more comparable to the GIMD scores.  
13  
14  
15  
16  
17  
18

### 19 **Methods for the weighting and methods for the statistical analysis**

20  
21 Additional to the original weighting of the GIMD 2010, we decided to use four methods for  
22  
23 the weighting of the GIMD domains found in a literature review (Table 1). We searched  
24  
25 relevant literature in the databases PubMed and Embase [e.g., keywords used in PubMed:  
26  
27 (deprivation OR deprived) AND (index OR indices) AND (area\* OR region\* OR  
28  
29 neighborhood OR neighbourhood), limits: English OR German OR French OR Italian OR  
30  
31 Spanish.]  
32  
33  
34  
35  
36  
37  
38  
39  
40  
41  
42  
43  
44  
45  
46  
47  
48  
49  
50  
51  
52  
53  
54  
55  
56  
57  
58  
59  
60

Table 1: Overview of identified weighting methods through a literature review: characteristics and evaluation of the methods (abbreviations in brackets)

| Normative weighting of the domains/indicators               |                                                                                                                                |                                                                                                                            | Empirical weighting of the domains/indicators                                                                                         |                                                                                                                     |                                                                                                                                                                                                                                                                  |                                                                                                     |                                                                                                                                                 |                                                                                                                                    |                                                                                                             |
|-------------------------------------------------------------|--------------------------------------------------------------------------------------------------------------------------------|----------------------------------------------------------------------------------------------------------------------------|---------------------------------------------------------------------------------------------------------------------------------------|---------------------------------------------------------------------------------------------------------------------|------------------------------------------------------------------------------------------------------------------------------------------------------------------------------------------------------------------------------------------------------------------|-----------------------------------------------------------------------------------------------------|-------------------------------------------------------------------------------------------------------------------------------------------------|------------------------------------------------------------------------------------------------------------------------------------|-------------------------------------------------------------------------------------------------------------|
| Weighting methods                                           | Equal weighting of domains/indicators                                                                                          | Expert weighting of the domains/ indicators                                                                                | Theory-based weighting of the domains                                                                                                 | Logistic regression                                                                                                 | Principal components analysis (PCA)                                                                                                                                                                                                                              | Bayesian factor analysis                                                                            | Exploratory factor analysis (EFA)                                                                                                               | Confirmatory factor analysis (CFA)                                                                                                 | Revealed preferences                                                                                        |
| <b>Description and weighting of the indicators/ domains</b> | - Equal weighting of the domains/ indicators                                                                                   | - Weighting of the domains/ indicators according to expert opinion                                                         | - Weighting of the domains: derived from research literature on multiple deprivation and social exclusion and by consultation process | - Deprivations: proxy as dependent, coefficients as relative weights of the domains                                 | - Extraction of factors from indicators<br>- Factors used as deprivation index/indices<br>- Factor loadings as relative weights of the indicators-<br>- Assume the existence of an unmeasured unifying concept, but make no prior judgements as to what that is. |                                                                                                     |                                                                                                                                                 | - Number of factors derived from research literature<br><br>- Factor loadings as relative weights of the indicators                | - Proportion of government spending allocated to each domain of the IMD was used to derive a set of weights |
| <b>Construction index</b>                                   | Additive score of the equally weighted indicators or domains                                                                   | Additive score of the weighted indicators or domains                                                                       |                                                                                                                                       |                                                                                                                     |                                                                                                                                                                                                                                                                  |                                                                                                     |                                                                                                                                                 |                                                                                                                                    |                                                                                                             |
| <b>Selected advantages of the methods</b>                   | - Simplest solution for aggregation of indicators to an overall score [20]<br><br>- Equal relevance of all indicators/ domains | - Different weighting of the indicators, according to the individual relevance<br><br>- Based on expert knowledge [20, 21] | - Weights derived from theory and research literature [6]                                                                             | - Derives outcome specific weights from the data [20]<br><br>- Easy handling of the model and the coefficients [21] | - Weights derived directly from the data [20]<br><br>- Easy handling, often used and robust approach [21-23]                                                                                                                                                     | - Weights derived directly from the data [20]<br><br>- Suited for analysis of small area units [24] | - Statistical model<br>- Derivation of number of factors by model fit [25]<br><br>- Exploration of latent dimensions without foreknowledge [25] | - Dimensions of deprivation derived from theory and set a priori [23]<br><br>- Measures of goodness of fit and error of model [25] | - Relative relevance of the domains, which influence public life, reflected by government spending [13]     |

|                                                     |                                                                                                                                                           |                                                                             |                                                                                                                                        |                                                                                                                                                                                                    |                                                                                                                                                                                                                                                                                                                |                                                                                                                                                                                                           |                                                                                                                                                                                                                                    |                                                                                                                                                                                                                                                                                                       |                                                                                             |
|-----------------------------------------------------|-----------------------------------------------------------------------------------------------------------------------------------------------------------|-----------------------------------------------------------------------------|----------------------------------------------------------------------------------------------------------------------------------------|----------------------------------------------------------------------------------------------------------------------------------------------------------------------------------------------------|----------------------------------------------------------------------------------------------------------------------------------------------------------------------------------------------------------------------------------------------------------------------------------------------------------------|-----------------------------------------------------------------------------------------------------------------------------------------------------------------------------------------------------------|------------------------------------------------------------------------------------------------------------------------------------------------------------------------------------------------------------------------------------|-------------------------------------------------------------------------------------------------------------------------------------------------------------------------------------------------------------------------------------------------------------------------------------------------------|---------------------------------------------------------------------------------------------|
| <p><b>Selected disadvantages of the methods</b></p> | <p>- Unintentional, implicit weighting of the domains of multiple deprivation possible (owing to the number of indicators included per dimension) [6]</p> | <p>- Arbitrary weighting possible, because of subjective decisions [20]</p> | <p>- Selected weights dependent on the quality of the research from the literature</p> <p>- Normative, subjective setting [21, 26]</p> | <p>- Derived coefficient dependent on the data quality</p> <p>- Removal or addition of variables can alter the coefficients significantly [20]</p> <p>- Large omitted variables, bias possible</p> | <p>- Descriptive data reduction of the variables [25]</p> <p>- All variables load on all factors [23]</p> <p>- Transferability to the population limited because of explanation of the sample variance [25]</p> <p>- Reduction to one factor does not consider the multidimensionality of deprivation [23]</p> | <p>- At least weakly informative prior information is required</p> <p>- Computationally more expensive</p> <p>- Reduction to one factor does not consider the multidimensionality of deprivation [23]</p> | <p>- Restricted temporal comparability [20]</p> <p>- Different interpretability of the results, several decisions required [25]</p> <p>- Reduction to one factor does not consider the multidimensionality of deprivation [23]</p> | <p>- Elaborate procedure: theoretical knowledge and conceptualization required [25]</p> <p>- Several decisions required regarding covariance structure and the method of parameter estimation [25]</p> <p>- Reduction to one factor does not consider the multidimensionality of deprivation [23]</p> | <p>- Overlap of the spending for the domains possible, unambiguous allocation elaborate</p> |
| <p><b>Selected examples</b></p>                     | <p>[27]</p>                                                                                                                                               | <p>[28]</p>                                                                 | <p>[8, 12]</p>                                                                                                                         | <p>[13]</p>                                                                                                                                                                                        | <p>[29]</p>                                                                                                                                                                                                                                                                                                    | <p>[24]</p>                                                                                                                                                                                               | <p>[30]</p>                                                                                                                                                                                                                        | <p>[31]</p>                                                                                                                                                                                                                                                                                           | <p>[13]</p>                                                                                 |

1  
2  
3 Besides the equal weighting of the domains, we used two commonly used empirical methods  
4 and an additional greedy maximization algorithm method. The purpose of the empirical  
5 approaches was to extract relative weights for the domain scores from an empirical dataset.  
6  
7 The extracted coefficients of the methods were used as relative weights for the domain scores,  
8 which should sum to 1 (or 100%), before the summation of the domains to an overall  
9 deprivation score.  
10  
11

12  
13  
14  
15  
16  
17  
18 *1. Original weighting of the domains of the GIMD through theoretical foundation and expert*  
19 *opinion according to Maier et al. [8]. For weights used, see Supplement 1.*  
20  
21

22  
23 *2. Equal weighting of the seven GIMD domains; thus, each domain weighted with 1/7.* This  
24 approach was originally used for deprivation indices by Carstairs and Townsend [32, 33]. To  
25 date, this approach is still used for deprivation indices consisting of just single deprivation  
26 indicators [26, 33]. For this approach, an equal importance of all deprivation indicators is  
27 assumed. In our analysis, we transferred this approach to the domain level.  
28  
29

30  
31  
32  
33  
34  
35 *3. Weighting of the domains by the coefficients of a linear regression analysis with a proxy*  
36 *for deprivation ('available living space per inhabitant') as the dependent variable and the*  
37 *GIMD domains as the independent variables.* We had to choose a dependent variable for the  
38 linear regression that had not been used for the construction of the GIMD domains and could  
39 be considered as an indicator of deprivation [13]. Townsend, Carstairs and Jarman considered  
40 overcrowding of living space as an indicator of deprivation [28, 32, 33]. We assumed that the  
41 availability of living space per inhabitant in an area could act as a proxy for area deprivation:  
42 the more deprived the area, the less living space is available per inhabitant [34-36]. For this  
43 approach, we calculated the absolute value of the regression coefficients and then used them  
44 as relative weights for the specific domains. Subsequently, the weighted domain scores were  
45 summed to an overall score. Linear models for the extraction of weights for a deprivation  
46 score have already been conducted in several studies [13, 37-38]. Because of the normal  
47  
48  
49  
50  
51  
52  
53  
54  
55  
56  
57  
58  
59  
60

1  
2  
3 distribution of the dependent variable, we conducted an ordinary least square (OLS)  
4  
5 regression.  
6  
7

8  
9 *4. Weighting of the GIMD domains using a greedy maximization algorithm [Kurz C, Maier*  
10 *W, Rink C. A greedy stacking algorithm for model ensembling and domain weighting.*  
11 *Working paper. 2019].* This yields weights for the domains close to the maximum possible  
12 correlation between the GIMD 2010 and mortality as a relevant outcome of deprivation  
13 (Supplement 3). The weighted domain scores of the GIMD were then added together to an  
14 overall index for both total mortality and premature mortality. This addition to the methods of  
15 the literature search aimed to extract weights for the maximum Spearman correlation between  
16 GIMD and mortality and can thus be seen as an outcome-specific approach with the  
17 independent variable mortality. Complete circularity was present because mortality had  
18 already been used for the extraction of the weights. In contrast, the other methods could be  
19 seen as general weighting approaches for deprivation indices.  
20  
21  
22  
23  
24  
25  
26  
27  
28  
29  
30  
31  
32

33  
34 *5. Weighting of the domains according to the results of an exploratory factor analysis (EFA).*  
35 We chose a principal axis factoring (PAF) approach for the extraction of the factors. PAF is a  
36 commonly used extraction method for factor analysis and requires no specific distribution of  
37 the entered variables. This non-parametric approach was necessary because of the  
38 exponentially transformed domains [25]. A priori, we specified the extraction of one factor (as  
39 a latent factor, measuring ‘multiple deprivation’) out of the seven domains. The absolute  
40 values of the factor loadings of the different domains were used as relative weights for the  
41 domains. Again, the weighted domains were added together to an overall deprivation score.  
42  
43  
44  
45  
46  
47  
48  
49  
50  
51  
52

### 53 **Correlation analysis and statistical software**

54 Subsequently, we performed a sensitivity analysis of the newly weighted GIMD versions. We  
55 conducted correlation analyses in order to calculate the relationship between the different  
56 GIMD versions and both total as well as premature mortality (in terms of SMRs) and  
57  
58  
59  
60

1  
2  
3 compared their results. For the analysis, we used Spearman's rank correlation coefficient ( $\rho$ )  
4 as a robust approach. This was required, in our opinion, as the GIMD score could be  
5 interpreted as an ordinal variable because of the ranking of the districts during the generation  
6 of the domain scores [7, 39]. Correlation analyses were each performed with a GIMD version  
7 and both total mortality and premature mortality. We also tested for significance of these  
8 bivariate correlation coefficients at an  $\alpha$ -level of 5% [40]. For comparison of the bivariate  
9 correlations among each other, we performed t-tests for paired correlations. For this, we used  
10 Williams's t-test for the comparison of correlations out of dependent samples [41]. We  
11 compared two correlation coefficients in terms of both total and premature mortality at an  $\alpha$ -  
12 level of 5%. For the statistical analysis, we used the Software R, version 3.2.3 [42].  
13  
14  
15  
16  
17  
18  
19  
20  
21  
22  
23  
24  
25  
26  
27  
28

### 29 **Patient and Public Involvement**

30 Patients and/or public were not involved in this study.  
31  
32  
33  
34

## 35 **RESULTS**

### 36 **Population size of the districts and estimation of the SMRs**

37  
38  
39 The size of the population of the 412 districts varied with median size of 139,188 inhabitants,  
40 IQR of 130,170 persons, minimum size of 33,944 and maximum size of 3,460,725 persons.  
41 Raw mortality of the 412 districts varied with median of 1,522 death cases, IQR of 1,347  
42 cases, minimum of 413 cases and maximum of 32,234 cases. Qualifying date of the data was  
43 31<sup>st</sup> December 2010. We estimated total mortality by calculating 'SMR<sub>total</sub>' for the districts  
44 with a mean of 1.0175 (standard error (SE): 0.004) and premature mortality 'SMR<sub>premature</sub>'  
45 with a mean of 1.0165 (SE: 0.004).  
46  
47  
48  
49  
50  
51  
52  
53  
54  
55  
56  
57  
58  
59  
60

### **Weights of the domains of the alternative approaches**

An overview of the identified weighting methods for deprivation indices is given in Table 1. Alongside a description of the weighting and the construction of the deprivation indices, we offered selected advantages and disadvantages of the methods. This was completed with selected examples. From this table, we chose four approaches additional to the original weighting of the GIMD.

We found considerable differences between the domain weights resulting from the different approaches (Table 2).



Table 2: Weighting of the domains of the GIMD<sup>1</sup> through different weighting approaches, values in percentage points

| Deprivation domains/<br>methods of<br>domain<br>weighting of<br>the GIMD <sup>1</sup> | Income | Employment | Education | Municipal<br>revenue | Social<br>capital | Environment | Security |
|---------------------------------------------------------------------------------------|--------|------------|-----------|----------------------|-------------------|-------------|----------|
| <b>Original weighting</b>                                                             | 25.00  | 25.00      | 15.00     | 15.00                | 10.00             | 5.00        | 5.00     |
| <b>Equal weighting</b>                                                                | 14.29  | 14.29      | 14.29     | 14.29                | 14.29             | 14.29       | 14.29    |
| <b>Linear regression</b>                                                              | 4.47   | 21.68      | 15.42     | 30.25                | 11.45             | 14.65       | 2.09     |
| <b>Maximization algorithm (total mortality)</b>                                       | 18.23  | 20.67      | 1.04      | 21.90                | 28.26             | 4.62        | 5.28     |
| <b>Maximization algorithm (premature mortality)</b>                                   | 18.85  | 48.93      | 0.31      | 15.98                | 10.73             | 0.50        | 4.70     |
| <b>Factor analysis</b>                                                                | 23.09  | 18.99      | 8.97      | 21.72                | 20.08             | 5.86        | 1.28     |

<sup>1</sup> GIMD: German Index of Multiple Deprivation;

**Original weighting:** Weighting according to Maier et al. [8];

**Equal weighting:** Every domain gets equal weighting ( $1/7 = 0.1429$ );

**Linear regression:** Weighting of the domains with regression coefficients with a deprivation proxy as dependent and domains as independent variables;

**Maximization algorithm:** Weighting of the domains in order to achieve the maximum Spearman correlation between overall index and mortality;

**Factor analysis:** Weighting of the domains with loadings from principal axis factoring .

1  
2  
3 The weights for employment deprivation showed the largest variation with a range of 34  
4 percentage points. The other deprivation domains showed a range of at least 13 percentage  
5 points. Educational deprivation within the maximization algorithm and income deprivation  
6 within the linear regression showed very small weights compared with the weights of the  
7 original GIMD 2010. Municipal revenue deprivation resulted in a weight twice as high as the  
8 original weight within the linear regression. Concerning the algorithm, the weight for social  
9 capital deprivation was three times the original weight. Concerning premature mortality, the  
10 weight for employment deprivation was twice as high as the original weight for the GIMD.  
11 Deprivation domains for social capital and district income showed constantly higher weights  
12 for the empirical approaches compared with the two normative methods. The different GIMD  
13 versions revealed different distributions of the overall deprivation scores (Table 3).  
14  
15  
16  
17  
18  
19  
20  
21  
22  
23  
24  
25  
26  
27  
28  
29  
30  
31  
32  
33  
34  
35  
36  
37  
38  
39  
40  
41  
42  
43  
44  
45  
46  
47  
48  
49  
50  
51  
52  
53  
54  
55  
56  
57  
58  
59  
60

Table 3: Descriptive results of the weighted indices, information on GIMD<sup>1</sup> scores

|                            | Original<br>weighting | Equal<br>weighting | Linear<br>regression | Maximization<br>algorithm SMR <sup>2</sup> 'total'<br>(SMR <sup>2</sup> 'premature') | Factor analysis |
|----------------------------|-----------------------|--------------------|----------------------|--------------------------------------------------------------------------------------|-----------------|
| <b>Number of districts</b> | 412                   | 412                | 412                  | 412 (412)                                                                            | 412             |
| <b>Mean</b>                | 21.81                 | 21.81              | 21.81                | 21.81 (21.81)                                                                        | 21.81           |
| <b>Median</b>              | 18.80                 | 19.97              | 19.34                | 17.05 (16.49)                                                                        | 18.17           |
| <b>Standard deviation</b>  | 12.73                 | 10.34              | 10.98                | 15.61 (17.09)                                                                        | 14.24           |
| <b>Minimum</b>             | 2.04                  | 2.29               | 2.11                 | 1.48 (0.92)                                                                          | 1.33            |
| <b>Maximum</b>             | 70.98                 | 55.69              | 67.67                | 85.91 (91.14)                                                                        | 79.86           |

<sup>1</sup>**GIMD:** German Index of Multiple Deprivation

<sup>2</sup> **SMR:** Standardized mortality ratio

**Original weighting:** Weighting according to Maier et al. [8];

**Equal weighting:** Every domain gets equal weighting ( $1/7 = 0.1429$ );

**Linear regression:** Weighting of the domains with regression coefficients with a deprivation proxy as dependent and domains as independent variables;

**Maximization algorithm:** Weighting of the domains in order to achieve the maximum Spearman correlation between overall index and both total mortality (SMR 'total') and premature mortality (SMR 'premature' in brackets);

**Factor analysis:** Weighting of the domains with loadings from principal axis factoring.

1  
2  
3 Assumptions for the linear regression were generally met, and the model had significant  
4 explanatory power (adj.  $R^2 = 0.33$ ). Five of the seven domains showed a significant effect on  
5 the deprivation proxy. Heterogeneity was present; thus, we presented robust standard errors.  
6  
7 Additionally, we provided tests of the assumptions of the linear regression model.  
8 (Supplement 4). The factor analysis generally had significant explanatory power (Chi-square:  
9 584.65,  $p < 0.0001$ ), but showed low reliability (Tucker–Lewis index = 0.50) and a RMSEA  
10 of 0.32 with tight confidence intervals (0.30- 0.34) indicated that this one factor was not a  
11 good fit to the data (Supplement 5).  
12  
13  
14  
15  
16  
17  
18  
19  
20  
21  
22  
23  
24

### 25 **Results of the statistical analysis**

26 Correlation analysis between the differently weighted deprivation indices and mortality  
27 showed different results (Table 4).  
28  
29  
30  
31  
32  
33  
34  
35  
36  
37  
38  
39  
40  
41  
42  
43  
44  
45  
46  
47  
48  
49  
50  
51  
52  
53  
54  
55  
56  
57  
58  
59  
60

Table 4: Spearman's rank correlation coefficients for the association between the versions of the GIMD<sup>1</sup> and both premature and total mortality.

| Methods of the domain weighting of the GIMD <sup>1</sup> | Total mortality (SMR <sup>2</sup> 'total') | Premature mortality (SMR <sup>2</sup> 'premature') |
|----------------------------------------------------------|--------------------------------------------|----------------------------------------------------|
| <b>Original weighting</b>                                | 0.578*** [0.506, 0.642]                    | 0.767*** [0.718, 0.808]                            |
| <b>Equal weighting</b>                                   | 0.535*** [0.459, 0.604]                    | 0.699*** [0.641, 0.750]                            |
| <b>Linear regression</b>                                 | 0.564*** [0.492, 0.629]                    | 0.738*** [0.685, 0.784]                            |
| <b>Maximization algorithm</b>                            | 0.615*** [0.547, 0.676]                    | 0.832*** [0.794, 0.864]                            |
| <b>Factor analysis</b>                                   | 0.598*** [0.529, 0.661]                    | 0.772*** [0.724, 0.813]                            |

\*\*\* p < 0.001, bootstrapped (10,000 fold), 95% confidence intervals in square brackets

<sup>1</sup> **GIMD**: German Index of Multiple Deprivation

<sup>2</sup> **SMR**: Standardized mortality ratio

**Original weighting**: Weighting according to Maier et al. [8];

**Equal weighting**: Every domain gets equal weighting (1/7 = 0.1429);

**Linear regression**: Weighting of the domains with regression coefficients with a deprivation proxy as dependent and domains as independent variables;

**Maximization algorithm**: Weighting of the domains in order to achieve the maximum Spearman correlation between overall index and mortality;

**Factor analysis**: Weighting of the domains with loadings from principal axis factoring.

1  
2  
3 Deprivation indices, domains weighted by the maximization algorithm, showed the maximum  
4 correlation with total mortality ( $\rho = 0.615$ ) and premature mortality ( $\rho = 0.832$ ). Correlations  
5 between the original GIMD and both total and premature mortality were  $\rho = 0.578$  and  $0.767$   
6 respectively. Correlations between the equally weighted GIMD and mortality were the lowest  
7 with  $\rho = 0.535$  and  $0.699$ . All correlations were significant concerning both total and  
8 premature mortality ( $p < 0.001$ ). Additionally, bivariate correlations between all indices were  
9 significant ( $\rho$  between  $0.86$  and  $0.98$ ).

10  
11  
12  
13  
14  
15  
16  
17  
18  
19  
20 Pairwise comparisons of the correlation coefficients with Williams's t-tests showed a  
21 differentiated result (see Supplement 6). Almost every pairwise difference in the correlation  
22 coefficients was significant at the 5%  $\alpha$ -level. One exception was the difference in the  
23 coefficients between the original GIMD and the GIMD weighted by linear regression  
24 concerning total mortality. The other deviation was the difference between the original GIMD  
25 and the GIMD weighted by factor analysis concerning premature mortality. The difference  
26 was not significant, neither one-sided nor two-sided. Maximum correlation coefficients of the  
27 GIMD, weighted by the algorithm, differed significantly from all the correlation coefficients  
28 of the other methods regarding both total and premature mortality. When we corrected for the  
29 multiple comparison of the difference of the correlation between the GIMD versions, there  
30 was a slight difference present in the significances (Supplement 7).  
31  
32  
33  
34  
35  
36  
37  
38  
39  
40  
41  
42  
43  
44  
45  
46  
47  
48

## 49 **DISCUSSION**

50  
51 The central objective of the study was to explore whether alternative weighting approaches  
52 had an influence on the relationship between area deprivation and mortality when applied to  
53 the GIMD. Thereby, different weighting methods were selected if they were, on the one hand,  
54 applicable to the domain-based construction of the GIMD and, on the other hand, seemed  
55 feasible in the course of an application of a multi-methodical approach. The four different  
56  
57  
58  
59  
60

1  
2  
3 methods were applied to the weighting of the domains of the GIMD 2010. The selected  
4  
5 approaches and the original method were compared concerning both the weighting of the  
6  
7 domains of the GIMD and the relationship between GIMD and mortality.  
8  
9

10  
11 There was little evidence in the literature concerning the application of different weighting  
12  
13 methods for multidimensional deprivation indices. However, a summary of different  
14  
15 weighting approaches and their classification was presented by Noble et al [6]. They briefly  
16  
17 assessed the specific procedures of the methods (e.g. empirical approaches) and were in  
18  
19 favour of a weighting driven by literature considerations on multiple deprivation. Regarding  
20  
21 the application of empirical weighting approaches for the English IMD 2004, we want to  
22  
23 emphasize Dibben's work [13]. He recommended new weights for the domains of the IMD,  
24  
25 as the empirical weighting approaches indicated a higher weighting of the health domain and  
26  
27 a lower weighting of the employment domain. However, this suggested swapping of weights  
28  
29 was not eventually applied to the subsequent versions of the English IMD. The maintenance  
30  
31 of the weights was justified by a consultation of IMD users and stable results of the IMD with  
32  
33 either existing or suggested weights [12].  
34  
35  
36  
37  
38

39 In this study, we pursued a multi-methodical approach for the weighting of the GIMD,  
40  
41 including empirical methods. Owing to the different inherent intentions of the selected  
42  
43 methods, we integrated the approaches as follows:  
44  
45

46  
47 *1. Normative approaches:* The original weighting of the domains according to Maier et al.  
48  
49 through theory and experts' opinion. We used the term 'normative' because weights for the  
50  
51 domains must be selected a priori subjectively before they can be validated with data.  
52  
53

54  
55 *2. Specific empirical approaches:* Concerning the maximization algorithm with the dependent  
56  
57 variable mortality, a weighting of the domains has been sought that was in line with the  
58  
59 relationship between area deprivation and both total mortality and premature mortality and  
60  
should maximize the correlation between them.

1  
2  
3 3. *General empirical approaches*: In contrast to the specific empirical approaches, the  
4 weighting of the domains was realized according to the results of a linear regression model or  
5 according to a factor analysis to generate generally applicable indices, which can also be used  
6 for the analysis of other health outcomes.  
7  
8  
9

10  
11  
12  
13 A further distinction of the methods can be made regarding their conceptual aspects. Factor  
14 analysis and PCA are unsupervised methods that require no prior judgements and construct  
15 deprivation solely based on the domain knowledge. On the other hand, linear regression and  
16 the maximization algorithm are supervised or predictive methods considering deprivation  
17 based on a specific proxy and assuming a relationship between this proxy and deprivation.  
18  
19  
20  
21  
22  
23  
24

### 25 **Assessment of the alternative weighting approaches**

26  
27 The high weighting of the deprivation domains income and employment of 50% altogether  
28 within the original GIMD was confirmed by the empirical weighting of the factor analysis  
29 approximately, as well as the weighting of the environment deprivation domain. Educational  
30 deprivation was weighted considerably lower by the factor analysis and algorithm than by the  
31 original GIMD. Deprivation domains for district income and social capital were constantly  
32 weighted much higher by the empirical approaches than by the approach of the original  
33 GIMD. The shift in the weighting of the domains can be explained by the data dependency of  
34 the empirical approaches and should be reviewed using alternative data. Should the higher  
35 weighting of the district income and social capital domains be confirmed, an adjustment in the  
36 domain weights could be considered. Perhaps those context variables have a higher relevance  
37 concerning area deprivation than expected by Maier et al. [8].  
38  
39  
40  
41  
42  
43  
44  
45  
46  
47  
48  
49  
50  
51  
52

53 The low weighting of the deprivation domains of income by the linear regression and  
54 education by the maximization algorithm can barely be reconciled with existing evidence  
55 regarding the positive relationship of these two deprivation domains and mortality [43, 44].  
56  
57  
58  
59  
60 The high weighting of the employment deprivation domain (49%) by the algorithm,



1  
2  
3 concerning mortality, could reflect the high relevance of unemployment relating to premature  
4 mortality.  
5  
6

### 7 8 **Relationship of the GIMD versions and mortality** 9

10 Throughout the analysis, we could not find a weighting method that could be seen as superior  
11 compared with the other approaches or could even be recommended as a gold standard. Even  
12 though almost all GIMD weighting approaches differed significantly in their correlation with  
13 mortality, using only significance as a method of evaluation for the approaches seemed  
14 inappropriate. The correlation coefficient between the different GIMD versions was already  
15 very high ( $\rho > 0.89$ ), so that even small non-relevant differences could have produced  
16 significant results. All correlations of the GIMD versions with mortality were highly  
17 significant and showed rather small differences in respect to absolute values ( $\rho$  between 0.54  
18 and 0.62). Since we conducted multiple paired t-tests, type-1 error inflation was present. In an  
19 additional analysis we corrected for multiple testing with Benjamini et al. adjustment [45].  
20 When we corrected for the correlation of the GIMD versions with mortality, the significance  
21 of the results did not change (Table 4). When we corrected for the multiple comparison of the  
22 difference of the correlation between the GIMD versions (Supplement 6), there was a slight  
23 difference present in the significance (Supplement 7).  
24  
25  
26  
27  
28  
29  
30  
31  
32  
33  
34  
35  
36  
37  
38  
39  
40  
41  
42

43 The empirical weighting of the GIMD by an exploratory factor analysis represented an  
44 adequate alternative to the theory-based weighting of the domains, on account of the simple  
45 operability and the highly significant association of this GIMD version with mortality.  
46 Thereby, a general applicability of the GIMD for the analysis of implications for other health  
47 outcomes can be ensured, and the results of different datasets can be compared by model fit  
48 measures [25]. Despite the significant correlation, the application of equal weighting of the  
49 domains could be considered as obsolete, as this would produce an implicit weighting of the  
50 domains depending on the availability of indicators for each domain [6].  
51  
52  
53  
54  
55  
56  
57  
58  
59  
60

### Strengths and limitations of the study

Using a multi-methodological strategy, we were able to cover a broad bandwidth of weighting approaches. As there seems to be no gold standard for weighting of deprivation indices, we recommend that sensitivity testing of the GIMD is particularly important. An equal weighting as well as an exploratory factor analysis for the weighting of multiple deprivation domains were carried out in this study for the first time. A factor analysis of the IMD domains was advised by Deas et al. [26], but has not been implemented to date. Furthermore, we provided an outcome-specific weighting approach in the form of a greedy maximization algorithm: this method produced a domain weighting of the GIMD that maximized a specific measure concerning one health outcome (in this case, the correlation between GIMD and mortality). A transfer of the algorithm to other areas of interest is possible without difficulty but should be used mainly for orientation, which is possible concerning a selected measure, given a dataset.

Limitations of the study concerned the selection of weighting methods such as the revealed preferences or Bayesian factor analysis (cf. Table 1), which resulted from restricted data access at a regional level. Empirical methods are always data dependent and are restricted concerning a possible comparison over time, especially with the use of cross-sectional data. This could be addressed by using longitudinal data and would enable us to measure ‘between variation’ (i.e. over different locations) to ‘within variation’ (i.e. the same location over time).

Using correlation coefficients to evaluate the association between different GIMD versions and mortality does not necessarily imply a causal association between area deprivation and mortality. Additionally, overfitting is present by using the greedy maximization algorithm as a weighting approach, since it already yields the weights for the maximum correlation between the GIMD and mortality. However, there is reliability of using the GIMD to evaluate total and premature mortality, since the correlation between the GIMD and mortality is very stable over time (GIMD scores from 2006 and 2010 yield very similar correlations with mortality).

1  
2  
3 Another point was the lack of literature regarding the application of different weighting  
4 procedures. This limitation could partly be counterbalanced with the input of expert  
5 interviews. With regard to the linear regression, the selection of the deprivation proxy should  
6  
7 be reconsidered ex post, as the use of the deprivation measure regarding living space per  
8 inhabitant showed a rather weak (yet significant) positive correlation with overall deprivation  
9  
10 ( $\rho = 0.35$ ). This could be explained by the idea that, in less deprived cities such as Hamburg  
11 and Munich, there can be – in general – less available living space because of a very  
12 competitive housing market. So, there could be a partial negative correlation between  
13 deprivation regarding available living space and overall deprivation in some areas.  
14  
15 Unfortunately, multidimensional proxies at district level were not available for Germany. We  
16 tested other measures like the overall Gross Domestic Product (GDP) per district and the GDP  
17 per employed persons per district. They had a similar or lower correlation with the original  
18 GIMD as the living space variable, but using them had some major drawbacks. We  
19 understand, that the use of a one-dimensional proxy is a limitation in our work. However,  
20 given the very restricted variety of appropriate variables at the district level in Germany, the  
21 selection of this proxy was a pragmatic approach to test a weighting approach based on a  
22 linear regression.  
23  
24

25  
26 We are aware that the stability of the GIMD could have also been tested by applying  
27 systematic changes to the weighting of the GIMD domains without using a framework of  
28 different weighting approaches. The correlation between some deprivation domains (e. g.,  
29 income or employment) is relatively high and thus any weighting scheme would likely give  
30 highly correlated results with mortality. A recent study from the UK showed that 94% of the  
31 variance in the English IMD could be explained by the income and employment domains  
32 alone, even though they had weights of 22.5% each in the overall index. The authors stated  
33 that even if the weights for the other domains had been zero, there would have been very little  
34 impact on the overall index [46]. Nevertheless, the aim of our study was to provide a  
35  
36  
37  
38  
39  
40  
41  
42  
43  
44  
45  
46  
47  
48  
49  
50  
51  
52  
53  
54  
55  
56  
57  
58  
59  
60

1  
2  
3 conceptual framework of weighting approaches (normative and empirical) for an index of  
4 multiple deprivation and to combine the results of the literature search with a sensitivity  
5 analysis based on the GIMD.  
6  
7  
8  
9

## 10 **Conclusion**

11  
12 The variation in the domain weights of the GIMD did not have a large measurable impact on  
13 the relationship between area deprivation and mortality. The correlation between the GIMD  
14 and both total mortality and premature mortality proved to be very stable, regardless of the  
15 application of the different weighting approaches and the resulting different sets of domain  
16 weights. The GIMD versions produced relatively stable results with regard to the central  
17 distribution measures of the overall scores (Table 3).  
18  
19  
20  
21  
22  
23  
24  
25

26  
27 The theory-based weighting of Maier et al. can be interpreted ex post as more conservative  
28 than the empirical weighting approaches, as the weighting of the income and employment  
29 domains is relatively strong at 50% in contrast to the empirical methods. Nevertheless, a  
30 theory-based selection of domains seems to be more meaningful than an empirically based  
31 selection because the results of the empirical methods are restricted, as discussed above. The  
32 stability with respect to the scores and the relationship to mortality support this advice. A  
33 modelling of the GIMD with a confirmatory factor analysis could be considered as a  
34 promising empirical approach with the prospect of temporal comparability in future studies.  
35  
36  
37  
38  
39  
40  
41  
42  
43  
44  
45  
46  
47  
48  
49

## 50 **Competing interests**

51 No competing interests to declare.  
52  
53  
54

## 55 **Data sharing statement**

56  
57 Extra data regarding the GIMD is available by emailing Werner Maier  
58 (werner.maier@helmholtz-muenchen.de).  
59  
60

### **Funding statement**

This study received no specific grant from any funding agency in the public, commercial or not-for-profit sectors.

### **Contributorship statement**

FS and WM designed the study. FS performed the analysis and wrote the initial version of the manuscript. CK gave statistical advice, provided the greedy maximization algorithm and gave support preparing the manuscript. WM provided the German Index of Multiple Deprivation (GIMD), supervised the study and gave support preparing the manuscript. JF advised on deprivation indices and gave support preparing the manuscript. All authors read and approved the final manuscript.

## Manuscript References

- 1 Mackenbach JP, Kunst AE, Cavelaars AE, *et al.* Socioeconomic inequalities in morbidity and mortality in western Europe. The EU Working Group on Socioeconomic Inequalities in Health. *Lancet (London, England)* 1997;**349**:1655-9.
- 2 Voigtlander S, Berger U, Razum O. The impact of regional and neighbourhood deprivation on physical health in Germany: a multilevel study. *BMC Public Health* 2010;**10**:403.
- 3 Siegel M, Mielck A, Maier W. Individual Income, Area Deprivation, and Health: Do Income-Related Health Inequalities Vary by Small Area Deprivation? *Health economics* 2015;**24**:1523-30.
- 4 Zhang X, Cook PA, Lisboa PJ, *et al.* The effects of deprivation and relative deprivation on self-reported morbidity in England: an area-level ecological study. *Int J Health Geogr* 2013;**12**:5.
- 5 Allender S, Scarborough P, Keegan T, *et al.* Relative deprivation between neighbouring wards is predictive of coronary heart disease mortality after adjustment for absolute deprivation of wards. *J Epidemiol Community Health.* 2012 Sep;**66**(9):803-8. doi: 10.1136/jech.2010.116723.
- 6 Noble M, Wright G, Smith G, *et al.* Measuring Multiple Deprivation at the Small-Area Level. *Environment and Planning A* 2006;**38**:169-85.
- 7 Maier W, Fairburn J, Mielck A. Regional deprivation and mortality in Bavaria. Development of a community-based index of multiple deprivation. *Gesundheitswesen* 2012;**74**:416-25.
- 8 Maier W, Holle R, Hunger M, *et al.* The impact of regional deprivation and individual socio-economic status on the prevalence of Type 2 diabetes in Germany. A pooled analysis of five population-based studies. *Diabet Med* 2013;**30**:e78-86.
- 9 Maier W, Scheidt-Nave C, Holle R, *et al.* Area Level Deprivation Is an Independent Determinant of Prevalent Type 2 Diabetes and Obesity at the National Level in Germany. Results from the National Telephone Health Interview Surveys 'German Health Update' GEDA 2009 and 2010. *Plos One* 2014;**9**:e89661.
- 10 Schäfer T, Pritzkeleit R, Jeszenszky C, *et al.* Trends and geographical variation of primary hip and knee joint replacement in Germany. *Osteoarthritis Cartilage* 2013;**21**:279-88.
- 11 Jansen L, Eberle A, Emrich K, *et al.* Socioeconomic deprivation and cancer survival in Germany: an ecological analysis in 200 districts in Germany. *Int J Cancer* 2014;**134**:2951-60.
- 12 Smith T, Noble M, Noble S, *et al.* The English Indices of Deprivation 2015. *London: Department for Communities and Local Government* 2015.
- 13 Dibben C, Atherton I, Cox M, *et al.* Investigating the impact of changing the weights that underpin the Index of Multiple Deprivation 2004. *London: Department for Communities and Local Government* 2007.

- 1  
2  
3 14 Fairburn J, Maier W, Braubach M. Incorporating Environmental Justice into Second  
4 Generation Indices of Multiple Deprivation: Lessons from the UK and Progress  
5 Internationally. *International Journal of Environmental Research and Public Health*  
6 2016;**13**:750.  
7  
8  
9 15 Cabrera-Barona, P., Murphy, T., Kienberger, S. & Blaschke, T. (2015) A multi-criteria  
10 spatial deprivation index to support health inequality analyses. *International Journal of*  
11 *Health Geographics*, 14(11).  
12  
13 16 Pampalon R, Hamel D, Gamache P, *et al.* A deprivation index for health planning in  
14 Canada. *Chronic diseases in Canada* 2009;**29**:178-91.  
15  
16  
17 17 Bauer H, Maier W. GIMD 2010 – Ein Update des ‚German Index of Multiple  
18 Deprivation‘. *Berichte des Helmholtz Zentrums München* (2018), doi:10.15134/2018M0001.  
19 [cited 2018 December 4]. Available from: [https://push-zb.helmholtz-](https://push-zb.helmholtz-muenchen.de/frontdoor.php?source_opus=54124&la=de)  
20 [muenchen.de/frontdoor.php?source\\_opus=54124&la=de](https://push-zb.helmholtz-muenchen.de/frontdoor.php?source_opus=54124&la=de).  
21  
22  
23 18 Statistische Ämter des Bundes und der Länder [Internet]. The Regional Database  
24 Germany. c2016. [cited 2017 June 25]. Available from:  
25 <https://www.regionalstatistik.de/genesis/online/>.  
26  
27  
28 19 Gregory IN. Comparisons between geographies of mortality and deprivation from the  
29 1900s and 2001: spatial analysis of census and mortality statistics . *BMJ* 2009 ; 339 : b3454  
30  
31 20 Folwell K. Single measures of deprivation. *J Epidemiol Community Health* 1995;**49 Suppl**  
32 **2**:S51-S56.  
33  
34 21 Gordon D. Census based deprivation indices: their weighting and validation. *Journal of*  
35 *Epidemiology and Community Health* 1995;**49**:S39-S44.  
36  
37  
38 22 Haase T, Pratschke J. The 2011 Pobal HP Deprivation Index for Small Areas (SA):  
39 Introduction and Reference Tables. Pobal 2012.  
40  
41 23 Haase T, Pratschke J. Deprivation and its Spatial Articulation in the Republic of Ireland.  
42 *Dublin: Area Development Management* 2005.  
43  
44 24 Mari-Dell'Olmo M, Martinez-Beneito MA, Borrell C, *et al.* Bayesian factor analysis to  
45 calculate a deprivation index and its uncertainty. *Epidemiology* 2011;**22**:356-64.  
46  
47  
48 25 Thompson B. *Exploratory and confirmatory factor analysis: Understanding concepts and*  
49 *applications*: American Psychological Association 2004.  
50  
51 26 Deas I, Robson B, Wong C, *et al.* Measuring Neighbourhood Deprivation: A Critique of  
52 the Index of Multiple Deprivation. *Environment and Planning C: Government and Policy*  
53 2003;**21**:883-903.  
54  
55  
56 27 Slachtova H, Tomaskova H, Splichalova A, *et al.* Czech socio-economic deprivation index  
57 and its correlation with mortality data. *Int J Public Health* 2009;**54**:267-73.  
58  
59  
60

- 1  
2  
3 28 Jarman B. Underprivileged areas: validation and distribution of scores. *Br Med J (Clin Res*  
4 *Ed)* 1984;**289**:1587-92.  
5  
6  
7 29 Meijer M, Engholm G, Grittner U, *et al.* A socioeconomic deprivation index for small  
8 areas in Denmark. *Scand J Public Health* 2013;**41**:560-9.  
9  
10 30 Testi A, Ivaldi E. Material versus social deprivation and health: a case study of an urban  
11 area. *Eur J Health Econ* 2009;**10**:323-8.  
12  
13 31 Haase T, Pratschke J, Gleeson J. All-Island Deprivation Index: Towards the development  
14 of consistent deprivation measures for the island of Ireland. *BORDERLANDS – The Journal*  
15 *of Spatial Planning in Ireland* 2012;**2**.  
16  
17  
18 32 Carstairs V, Morris R. Deprivation and health in Scotland. *Health Bull (Edinb)*. 1990  
19 Jul;**48**(4):162-75.  
20  
21 33 Townsend P, Phillimore P, Beattie A. Health and Deprivation: inequality and the North  
22 (London, Croom Helm). *Links* 1988.  
23  
24  
25 34. Atkinson J, Salmond C, Crampton P. NZDep2013 Index of Deprivation. c2014. [cited  
26 2018 June 11]. Available from: <https://www.otago.ac.nz/wellington/otago069936.pdf>.  
27  
28  
29 35. Boarini R, d’Ercole MM, Measures of Material Deprivation in OECD Countries. c2006.  
30 [cited 2018 June 11]. Available from: <http://www.oecd.org/social/soc/37223552.pdf>  
31  
32 36. Eurostat. Housing conditions. c2017. [cited 2018 June 11]. Available from:  
33 [http://ec.europa.eu/eurostat/statistics-](http://ec.europa.eu/eurostat/statistics-explained/index.php/Housing_conditions#Housing_quality.C2.A0.E2.80.94.C2.A0overcrowding)  
34 [explained/index.php/Housing\\_conditions#Housing\\_quality.C2.A0.E2.80.94.C2.A0overcrowd](http://ec.europa.eu/eurostat/statistics-explained/index.php/Housing_conditions#Housing_quality.C2.A0.E2.80.94.C2.A0overcrowding)  
35 [ing](http://ec.europa.eu/eurostat/statistics-explained/index.php/Housing_conditions#Housing_quality.C2.A0.E2.80.94.C2.A0overcrowding)  
36  
37  
38 37 Ivaldi E, Testi A. Genoa Index of Deprivation (GDI): An index of material deprivation for  
39 geographical areas. *Social Indicators: Statistics, Trends and Policy Development* 2010:75.  
40  
41  
42 38 Pernet C, Delpierre C, Dejardin O *et al.* Construction of an adaptable European  
43 transnational ecological deprivation index: The French version. *Journal of epidemiology and*  
44 *community health* 2012; **66**: 982-989.  
45  
46 39 Brown TA. *Confirmatory Factor Analysis for Applied Research*. New York: The Guilford  
47 Press 2006.  
48  
49  
50 40 Hollander M, Wolfe DA. *Nonparametric statistical methods*. 1973.  
51  
52 41 Williams EJ. *Regression analysis*: wiley New York 1959.  
53  
54 42 Team RC. *R: a language and environment for statistical computing*. Vienna, Austria;  
55 2015.  
56  
57 43 Cutler D, Deaton A, Lleras-Muney A. The determinants of mortality. *The Journal of*  
58 *Economic Perspectives* 2006;**20**:97-120.  
59  
60



1  
2  
3 44 Wolfson MC, Kaplan G, Lynch J, *et al.* Relation between income inequality and mortality:  
4 empirical demonstration. *Western J Med* 2000;**172**:22-4.  
5

6  
7 45 Benjamini, Y., and Yekutieli, D. (2001). The control of the false discovery rate in multiple  
8 testing under dependency. *Annals of Statistics* 29, 1165--1188.  
9

10 46 Abel GA, Barclay ME, Payne RA. Adjusted indices of multiple deprivation to enable  
11 comparisons within and between constituent countries of the UK including an illustration  
12 using mortality rates. *BMJ Open*. 2016 Nov 15;6(11):e012750. doi: 10.1136/bmjopen-2016-  
13 012750.  
14  
15  
16  
17  
18  
19  
20  
21  
22  
23  
24  
25  
26  
27  
28  
29  
30  
31  
32  
33  
34  
35  
36  
37  
38  
39  
40  
41  
42  
43  
44  
45  
46  
47  
48  
49  
50  
51  
52  
53  
54  
55  
56  
57  
58  
59  
60

For peer review only

1  
2  
3  
4  
5  
6  
7  
8  
9  
10  
11  
12  
13  
14  
15  
16  
17  
18  
19  
20  
21  
22  
23  
24  
25  
26  
27  
28  
29  
30  
31  
32  
33  
34  
35  
36  
37  
38  
39  
40  
41  
42  
43  
44  
45  
46  
47  
48  
49  
50  
51  
52  
53  
54  
55  
56  
57  
58  
59  
60

## SUPPLEMENT

Supplement 1: Weighting of the domains and use of indicators from the ‘German Index of Multiple Deprivation’ (GIMD).

| Domains                              | Domain weight (%) | Indicators (reference)                                                                                                  |
|--------------------------------------|-------------------|-------------------------------------------------------------------------------------------------------------------------|
| <b>Income deprivation</b>            | 25                | - Total earnings<br>(Number of Taxpayers)                                                                               |
| <b>Employment deprivation</b>        | 25                | - Total number of unemployed<br>(Population, 15 to 65 years)                                                            |
| <b>Educational deprivation</b>       | 15                | - Persons without vocational training<br>(Employees subject to social security contributions at the place of residence) |
| <b>Municipal revenue deprivation</b> | 15                | - Tax revenue of municipalities<br>(Total population)                                                                   |
| <b>Social capital deprivation</b>    | 10                | - Migration balance*<br>(Total population)<br>- Electoral participation in %<br>(Federal parliament)                    |
| <b>Environment deprivation</b>       | 5                 | - Commercial, industrial and traffic areas **<br>(Total area)                                                           |
| <b>Security deprivation</b>          | 5                 | - Number of road accidents(Total population)<br>- Number of crimes(Total population)                                    |

\* People moving into a municipality or a district minus people leaving a municipality or a district.

\*\* Indicator for soil sealing.

Supplement 2: Calculation of the standardized mortality rates (SMR):

1. SMR 'total mortality' per district = total deaths per district / expected total deaths per district

2. Expected total deaths per district = total population size per district \* total mortality rate per 100,000 per district / 100,000

3. Total mortality rate per 100,000 per district = total deaths per district/total population size per district\*100,000

4. SMR 'premature mortality' per district = premature (before 65 years) deaths per district / expected premature (before 65 years) deaths per district

5. Expected premature deaths per district = premature population size per district \* premature mortality rate per 100,000 per district / 100,000

6. Premature mortality rate per 100,000 per district = premature deaths per district/premature population size per district\*100,000

1  
2  
3 Supplement 3: Working steps of the greedy weighting algorithm.  
4  
5  
6  
7

- 8 • The vector P containing the greedy solution of the non-normalized weighted sum in  
9 each step is initialized with zero elements.  
10  
11
- 12 • All column weights and the total number of weights are also initialized to zero. In each  
13 iteration, first, the total number of weights is incremented.  
14  
15
- 16 • Then, all sums of P with a column of X are normalized by the total number of weights  
17 and evaluated separately on the evaluation metric (correlation).  
18  
19
- 20 • The column corresponding to the highest value is assigned one weight factor and added  
21 to P. This procedure is repeated 100 times.  
22  
23
- 24 • The algorithm returns a vector of length N, with the number of columns of X, containing  
25 weights for each column, summing to 1.  
26  
27  
28  
29  
30  
31  
32  
33  
34  
35  
36  
37  
38  
39  
40  
41  
42  
43  
44  
45  
46  
47  
48  
49  
50  
51  
52  
53  
54  
55  
56  
57  
58  
59  
60

Supplement 4: Results of the linear regression: Outcome: deprivation proxy, Covariables: domains of the GIMD10.

Deprivation of living space = Income + Employment + Education + Municipal income + Social capital + Environment + Security

---

**Coefficients (Robust Standard Errors in Parenthesis)**

|                  |                      |
|------------------|----------------------|
| Income           | 0.014<br>(0.051)     |
| Employment       | 0.067*<br>(0.029)    |
| Education        | -0.048*<br>(0.023)   |
| Municipal income | -0.094***<br>(0.025) |
| Social capital   | 0.035**<br>(0.014)   |
| Environment      | 0.045***<br>(0.011)  |
| Security         | -0.006<br>(0.008)    |

---

**Model**

R-squared = 0.34

adj. R-squared = 0.33

F = 30.01

p < 0.001

Log-likelihood = -1050.76

Deviance = 3959.74

AIC = 2117.52

BIC = 2149.69

N = 412

---

\*\*\* p < 0.001; \*\* p < 0.01; \* p < 0.05; n.s. not significant

Source: R-Output, regression results conducted with R-package 'stargazer'

(Hlavac M. stargazer: Well-Formatted Regression and Summary Statistics Tables. R package version 5.2. 2015.)

→ All domains have a significant effect on the proxy, except security and Income

→ Overall model explains the variance of living space deprivation significantly,  $R^2 = 0.34$

## Test of the assumptions of the linear regression model:

### 1. Normality of the residuals

Shapiro-Wilk normality test of the residuals of the model:

$W = 0.99668$ ,  $p\text{-value} = 0.5588$

→ Distribution of residuals of the model differ not significantly from normal distribution

Figure 1: Histogram of the distribution of the residuals:

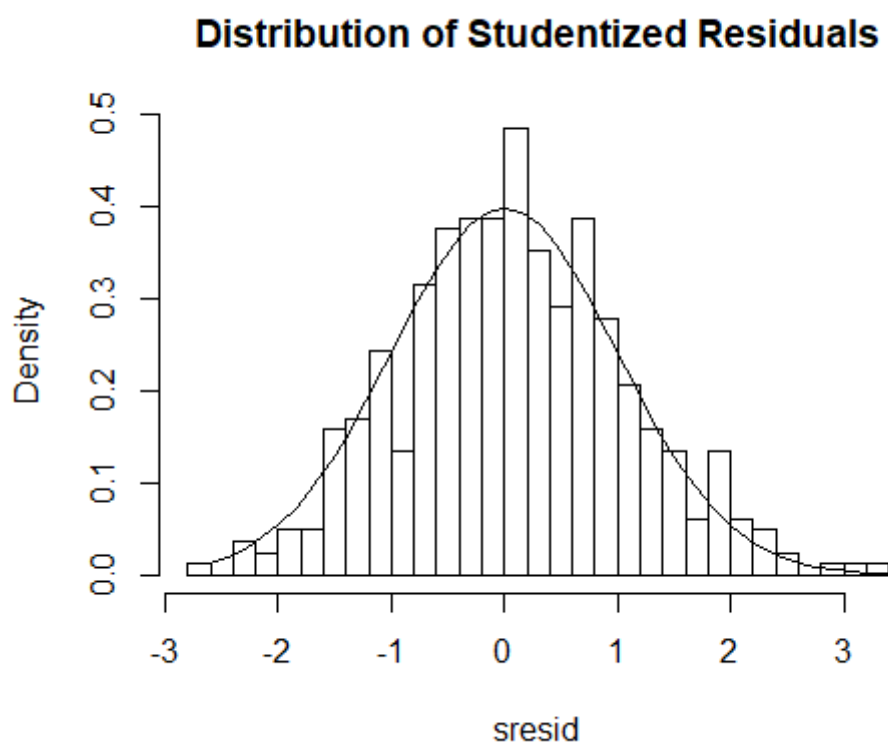

2.

→ Distribution of residuals of the model differ not significantly from normal distribution

## 2.Homoscedasticity

### Non-constant Variance Score Test

Chi-square = 5.910324 Df = 1 p = 0.0150524

→ assumption of constant variance violated

Figure 2: Plot of the standardized residuals vs. fitted values

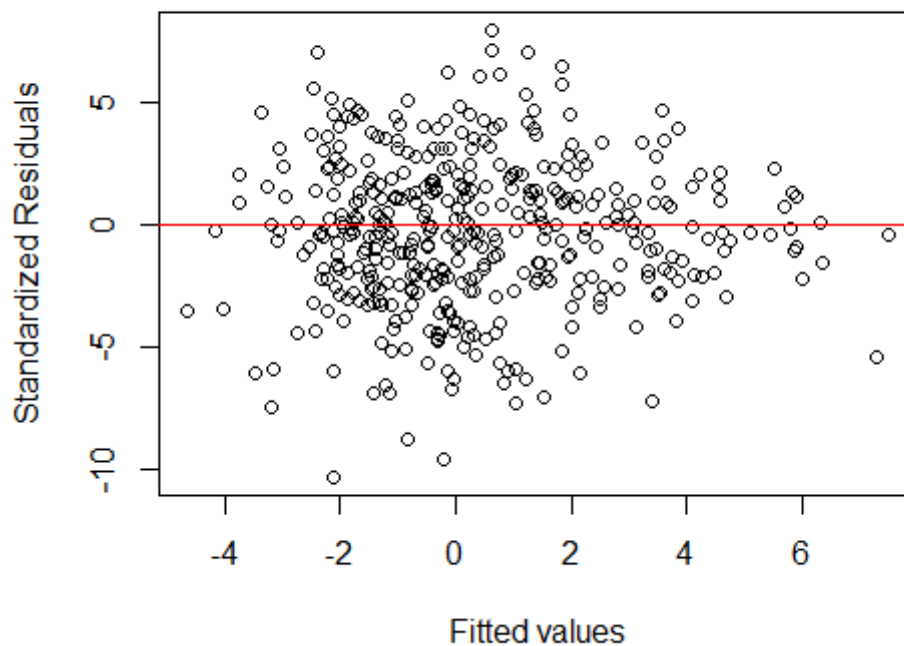

→ Visually no violation of the homoscedasticity assumption

→ Due to the results of the Non-constant Variance Score Test, we conducted robust standard errors for the model

### 3. Multicollinearity

Variance inflation factors of the independent variables:

Income: 10.01, Employment: 8.79, Education: 2.49, Municipal Income: 5.75, Social Capital:  
7.86, Environment: 3.96, Security: 2.88

→ Only Income has a value above the critical value of 10

→ Some minor multicollinearity regarding Income

### 4. Autocorrelation

Durbin Watson Test

| Autocorrelation | D-W Statistic | p-value |
|-----------------|---------------|---------|
| 0.5036934       | 0.9876657     | <0.001  |

Alternative hypothesis:  $\rho \neq 0$

→ Autocorrelation is present



## 5. Nonlinearity

Figure 3: Partial residuals plot

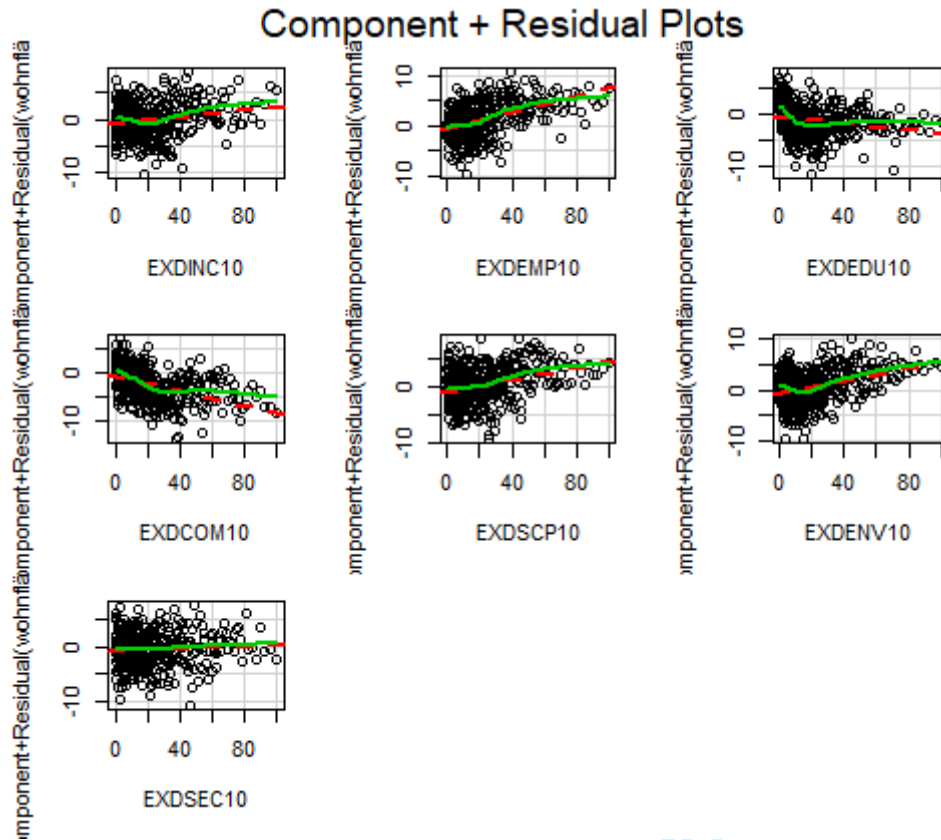

→ Linearity assumption violated for domains of education (EXDEDU10), municipal income (EXDCOM10) and Environment (EXDENV10)

→ But domain weights should be obtained, so we use the untransformed variables

Supplement 5: Results of an exploratory factor analysis of the deprivation domains with the extraction of one factor, method = principal axis factor analysis.

| Standardized loadings | Factor 1 | Communality ( $u^2$ ) | Specific variance ( $1 - u^2$ ) |
|-----------------------|----------|-----------------------|---------------------------------|
| Income                | 0.92     | 0.85                  | 0.15                            |
| Employment            | 0.76     | 0.58                  | 0.42                            |
| Education             | -0.36    | 0.13                  | 0.87                            |
| Municipal income      | 0.87     | 0.75                  | 0.25                            |
| Social capital        | 0.80     | 0.64                  | 0.36                            |
| Environment           | -0.23    | 0.06                  | 0.94                            |
| Security              | -0.05    | 0.01                  | 0.99                            |

| Model                                           | Factor 1 |
|-------------------------------------------------|----------|
| Variance, explained by the factor (SS loadings) | 3.01     |
| Proportion of total variance                    | 0.43     |

| Model fit measures                          |                        |
|---------------------------------------------|------------------------|
| Root mean square of the residuals (RMSR)    | 0.17                   |
| Likelihood chi square                       | 584.65 ( $p < 0.001$ ) |
| Tucker-Lewis index of factoring reliability | 0.50                   |
| RMSEA index (confidence interval)           | 0.32 ([0.30; 0.34])    |
| BIC                                         | 500.35                 |

Source: Tables output from R and own presentation

Supplement 6: Test<sup>1</sup> of the differences in the Spearman correlation coefficients for the relationship of the GIMD<sup>2</sup> versions and both total and premature mortality

| Total mortality               | Original weighting                        | Equal weighting            | Linear regression                        | Maximization algorithm        | Factor analysis                           |
|-------------------------------|-------------------------------------------|----------------------------|------------------------------------------|-------------------------------|-------------------------------------------|
| <b>Original weighting</b>     | 0                                         | 0.043**<br>[0.015, 0.074]  | 0.014 <sup>n.s.</sup><br>[-0.006, 0.034] | -0.037***<br>[-0.060, -0.016] | -0.020**<br>[-0.038, -0.005]              |
| <b>Equal weighting</b>        | -0.043**<br>[-0.074, -0.015]              | 0                          | -0.029*<br>[-0.059, -0.001]              | -0.080***<br>[-0.122, -0.041] | -0.063***<br>[-0.105, -0.025]             |
| <b>Linear regression</b>      | -0.014 <sup>n.s.</sup><br>[-0.034, 0.006] | 0.029*<br>[0.001, 0.059]   | 0                                        | -0.051***<br>[-0.080, -0.024] | -0.034**<br>[-0.059, -0.011]              |
| <b>Maximization algorithm</b> | 0.037***<br>[0.016, 0.060]                | 0.080***<br>[0.041, 0.122] | 0.051***<br>[0.024, 0.080]               | 0                             | 0.016**<br>[0.003, 0.031]                 |
| <b>Factor analysis</b>        | 0.020**<br>[0.005, 0.038]                 | 0.063***<br>[0.025, 0.105] | 0.034**<br>[0.011, 0.059]                | -0.016**<br>[-0.031, -0.003]  | 0                                         |
| <b>Premature mortality</b>    |                                           |                            |                                          |                               |                                           |
| <b>Original weighting</b>     | 0                                         | 0.068***<br>[0.044, 0.097] | 0.028***<br>[0.012, 0.049]               | -0.065***<br>[-0.093, -0.043] | -0.005 <sup>n.s.</sup><br>[-0.021, 0.019] |
| <b>Equal weighting</b>        | -0.068***<br>[-0.097, -0.044]             | 0                          | -0.040***                                | -0.133***<br>[-0.174, -0.098] | -0.073***<br>[0.110, -0.040]              |
| <b>Linear regression</b>      | -0.028***<br>[-0.049, -0.012]             | -0.040***                  | 0                                        | -0.094***<br>[-0.128, -0.066] | -0.034***<br>[-0.014, -0.057]             |
| <b>Maximization algorithm</b> | 0.065***<br>[0.043, 0.093]                | 0.133***<br>[0.098, 0.174] | 0.094***<br>[0.066, 0.128]               | 0                             | 0.060***<br>[0.037, 0.088]                |
| <b>Factor analysis</b>        | 0.005 <sup>n.s.</sup><br>[-0.019, 0.021]  | 0.073***<br>[0.040, 0.110] | 0.034***<br>[0.014, 0.057]               | -0.060***<br>[-0.088, -0.037] | 0                                         |

\*\*\* p < 0.001; \*\* p < 0.01; \* p < 0.05; n.s. not significant, 95% confidence intervals in square brackets

<sup>1</sup> Test of the significance of the differences with Williams's t-test for paired correlations

<sup>2</sup> **GIMD:** German Index of Multiple Deprivation

**Original weighting:** Spearman correlation between GIMD (weighting according to Maier et al. [8]) and both total and premature mortality;

**Equal weighting:** Spearman correlation between GIMD (domains equally weighted) and both total and premature mortality;

**Linear regression:** Spearman correlation between GIMD (weighting of the domains with regression coefficients with a deprivation proxy as dependent and domains as independent variables) and both total and

1  
2  
3 premature mortality;

4  
5 **Maximization algorithm:** Spearman correlation between GIMD (weighting of the domains for the maximum  
6  
7 Spearman correlation between overall index and mortality) and both total and premature mortality;

8  
9 **Factor analysis:** Spearman correlation between GIMD (weighting of the domains with loadings from principal  
10  
11 axis factoring) and both total and premature mortality.  
12  
13  
14  
15  
16  
17  
18  
19  
20  
21  
22  
23  
24  
25  
26  
27  
28  
29  
30  
31  
32  
33  
34  
35  
36  
37  
38  
39  
40  
41  
42  
43  
44  
45  
46  
47  
48  
49  
50  
51  
52  
53  
54  
55  
56  
57  
58  
59  
60

For peer review only

Supplement 7: Corrected Test<sup>1</sup> of the differences in the Spearman correlation coefficients for the relationship of the GIMD<sup>2</sup> versions and both total and premature mortality.

| Total mortality (all age groups)           | Original weighting     | Equal weighting | Linear regression     | Maximization algorithm | Factor analysis        |
|--------------------------------------------|------------------------|-----------------|-----------------------|------------------------|------------------------|
| <b>Original weighting</b>                  | 0                      | 0.043*          | 0.014 <sup>n.s.</sup> | -0.037**               | -0.020*                |
| <b>Equal weighting</b>                     | -0.043*                | 0               | -0.029*               | -0.080***              | -0.064**               |
| <b>Linear regression</b>                   | -0.014 <sup>n.s.</sup> | 0.029*          | 0                     | -0.051 ***             | -0.034*                |
| <b>Maximization algorithm</b>              | 0.037**                | 0.080**         | 0.051**               | 0                      | 0.016*                 |
| <b>Factor analysis</b>                     | 0.020*                 | 0.064**         | 0.034*                | -0.016 *               | 0                      |
| <b>Premature mortality (&lt; 65 years)</b> |                        |                 |                       |                        |                        |
| <b>Original weighting</b>                  | 0                      | 0.068***        | 0.028***              | -0.065***              | -0.005 <sup>n.s.</sup> |
| <b>Equal weighting</b>                     | -0.068***              | 0               | -0.040**              | -0.133***              | -0.073***              |
| <b>Linear regression</b>                   | -0.028***              | -0.040**        | 0                     | -0.094 ***             | -0.034***              |
| <b>Maximization algorithm</b>              | 0.065***               | 0.133***        | 0.094 ***             | 0                      | 0.060***               |
| <b>Factor analysis</b>                     | 0.005 <sup>n.s.</sup>  | 0.073***        | 0.034***              | -0.060***              | 0                      |

\*\*\* p < 0.001; \*\* p < 0.01; \* p < 0.05; n.s. not significant

<sup>1</sup> Test of the significance of the differences with Williams's t-test for paired correlations

<sup>2</sup> GIMD: German Index of Multiple Deprivation

**Original weighting:** Spearman correlation between GIMD (weighting according to Maier et al. [8]) and both total and premature mortality;

**Equal weighting:** Spearman correlation between GIMD (domains equally weighted) and both total and premature mortality;

**Linear regression:** Spearman correlation between GIMD (weighting of the domains with regression

1  
2  
3 coefficients with a deprivation proxy as dependent and domains as independent variables) and both total and  
4  
5 premature mortality;

6  
7 **Maximization algorithm:** Spearman correlation between GIMD (weighting of the domains for the maximum  
8  
9 Spearman correlation between overall index and mortality) and both total and premature mortality;

10  
11 **Factor analysis:** Spearman correlation between GIMD (weighting of the domains with loadings from principal  
12  
13 axis factoring) and both total and premature mortality.  
14  
15  
16  
17  
18  
19  
20  
21  
22  
23  
24  
25  
26  
27  
28  
29  
30  
31  
32  
33  
34  
35  
36  
37  
38  
39  
40  
41  
42  
43  
44  
45  
46  
47  
48  
49  
50  
51  
52  
53  
54  
55  
56  
57  
58  
59  
60

For peer review only
