# Supplementary material for: Do alternative weighting approaches for an Index of Multiple Deprivation change the association with mortality? A sensitivity analysis from Germany
Source: PubMed Central journal article supplement — BMJ Open. 2019 Aug 26;9(8):e028553. doi: 10.1136/bmjopen-2018-028553 (PMC6719755; doi:10.1136/bmjopen-2018-028553), 2019-08-26
Supplement: bmjopen-2018-028553supp001.pdf [file bmjopen-2018-028553supp001.pdf]

## SUPPLEMENT

Supplement 1: Weighting of the domains and use of indicators from the ‘German Index of Multiple Deprivation’ (GIMD).

| <b>Domains</b>                       | <b>Domain weight (%)</b> | <b>Indicators (reference)</b>                                                                                           |
|--------------------------------------|--------------------------|-------------------------------------------------------------------------------------------------------------------------|
| <b>Income deprivation</b>            | 25                       | - Total earnings<br>(Number of Taxpayers)                                                                               |
| <b>Employment deprivation</b>        | 25                       | - Total number of unemployed<br>(Population, 15 to 65 years)                                                            |
| <b>Educational deprivation</b>       | 15                       | - Persons without vocational training<br>(Employees subject to social security contributions at the place of residence) |
| <b>Municipal revenue deprivation</b> | 15                       | - Tax revenue of municipalities<br>(Total population)                                                                   |
| <b>Social capital deprivation</b>    | 10                       | - Migration balance*<br>(Total population)<br><br>- Electoral participation in %<br>(Federal parliament)                |
| <b>Environment deprivation</b>       | 5                        | - Commercial, industrial and traffic areas **<br>(Total area)                                                           |
| <b>Security deprivation</b>          | 5                        | - Number of road accidents(Total population)<br><br>- Number of crimes(Total population)                                |

\* People moving into a municipality or a district minus people leaving a municipality or a district.

\*\* Indicator for soil sealing.

Supplement 2: Calculation of the standardized mortality rates (SMR):

1. SMR 'total mortality' per district = total deaths per district / expected total deaths per district
2. Expected total deaths per district = total population size per district \* total mortality rate per 100,000 per district / 100,000
3. Total mortality rate per 100,000 per district = total deaths per district/total population size per district\*100,000
4. SMR 'premature mortality' per district = premature (before 65 years) deaths per district / expected premature (before 65 years) deaths per district
5. Expected premature deaths per district = premature population size per district \* premature mortality rate per 100,000 per district / 100,000
6. Premature mortality rate per 100,000 per district = premature deaths per district/premature population size per district\*100,000

Supplement 3: Working steps of the greedy weighting algorithm.

- The vector  $P$  containing the greedy solution of the non-normalized weighted sum in each step is initialized with zero elements.
- All column weights and the total number of weights are also initialized to zero. In each iteration, first, the total number of weights is incremented.
- Then, all sums of  $P$  with a column of  $X$  are normalized by the total number of weights and evaluated separately on the evaluation metric (correlation).
- The column corresponding to the highest value is assigned one weight factor and added to  $P$ . This procedure is repeated 100 times.
- The algorithm returns a vector of length  $N$ , with the number of columns of  $X$ , containing weights for each column, summing to 1.

Supplement 4: Results of the linear regression: Outcome: deprivation proxy, Covariables: domains of the GIMD10.

Deprivation of living space = Income + Employment + Education + Municipal income + Social capital + Environment + Security

---



---

**Coefficients (Robust Standard Errors in Parenthesis)**

|                  |                      |
|------------------|----------------------|
| Income           | 0.014<br>(0.051)     |
| Employment       | 0.067*<br>(0.029)    |
| Education        | -0.048*<br>(0.023)   |
| Municipal income | -0.094***<br>(0.025) |
| Social capital   | 0.035**<br>(0.014)   |
| Environment      | 0.045***<br>(0.011)  |
| Security         | -0.006<br>(0.008)    |

---

**Model**

R-squared = 0.34

adj. R-squared = 0.33

F = 30.01

p < 0.001

Log-likelihood = -1050.76

Deviance = 3959.74

AIC = 2117.52

BIC = 2149.69

N = 412

---



---

\*\*\* p < 0.001; \*\* p < 0.01; \* p < 0.05; n.s. not significant

Source: R-Output, regression results conducted with R-package 'stargazer'

(Hlavac M. stargazer: Well-Formatted Regression and Summary Statistics Tables. R package version 5.2. 2015.)

→ All domains have a significant effect on the proxy, except security and Income

→ Overall model explains the variance of living space deprivation significantly,  $R^2 = 0.34$

**Test of the assumptions of the linear regression model:**

1. Normality of the residuals

Shapiro-Wilk normality test of the residuals of the model:

$W = 0.99668$ ,  $p\text{-value} = 0.5588$

→ Distribution of residuals of the model differ not significantly from normal distribution

Figure 1: Histogram of the distribution of the residuals:

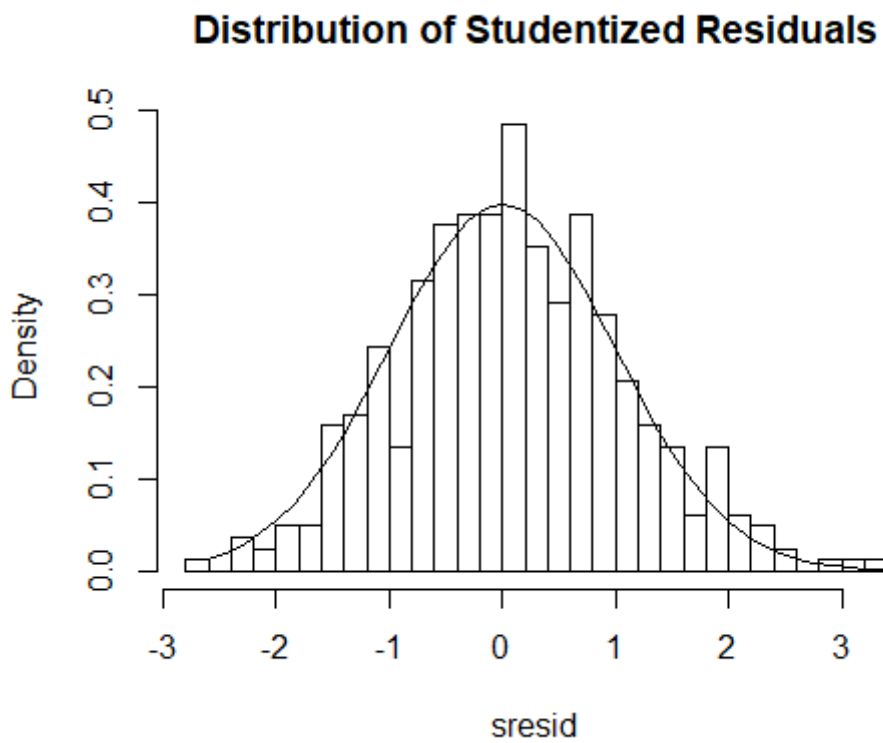

2.

→ Distribution of residuals of the model differ not significantly from normal distribution

## 2.Homoscedasticity

Non-constant Variance Score Test

Chi-square = 5.910324 Df = 1 p = 0.0150524

→ assumption of constant variance violated

Figure 2: Plot of the standardized residuals vs. fitted values

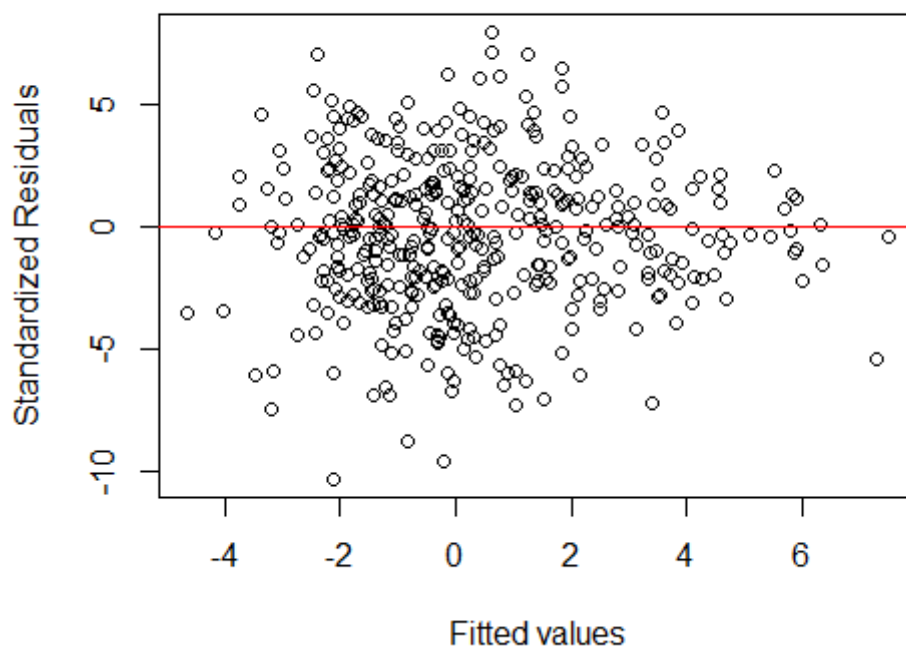

→ Visually no violation of the homoscedasticity assumption

→ Due to the results of the Non-constant Variance Score Test, we conducted robust standard errors for the model

### 3. Multicollinearity

Variance inflation factors of the independent variables:

Income: 10.01, Employment: 8.79, Education: 2.49, Municipal Income: 5.75, Social Capital:  
7.86, Environment: 3.96, Security: 2.88

→ Only Income has a value above the critical value of 10

→ Some minor multicollinearity regarding Income

### 4. Autocorrelation

Durbin Watson Test

| Autocorrelation | D-W Statistic | p-value |
|-----------------|---------------|---------|
| 0.5036934       | 0.9876657     | <0.001  |

Alternative hypothesis:  $\rho \neq 0$

→ Autocorrelation is present

## 5. Nonlinearity

Figure 3: Partial residuals plot

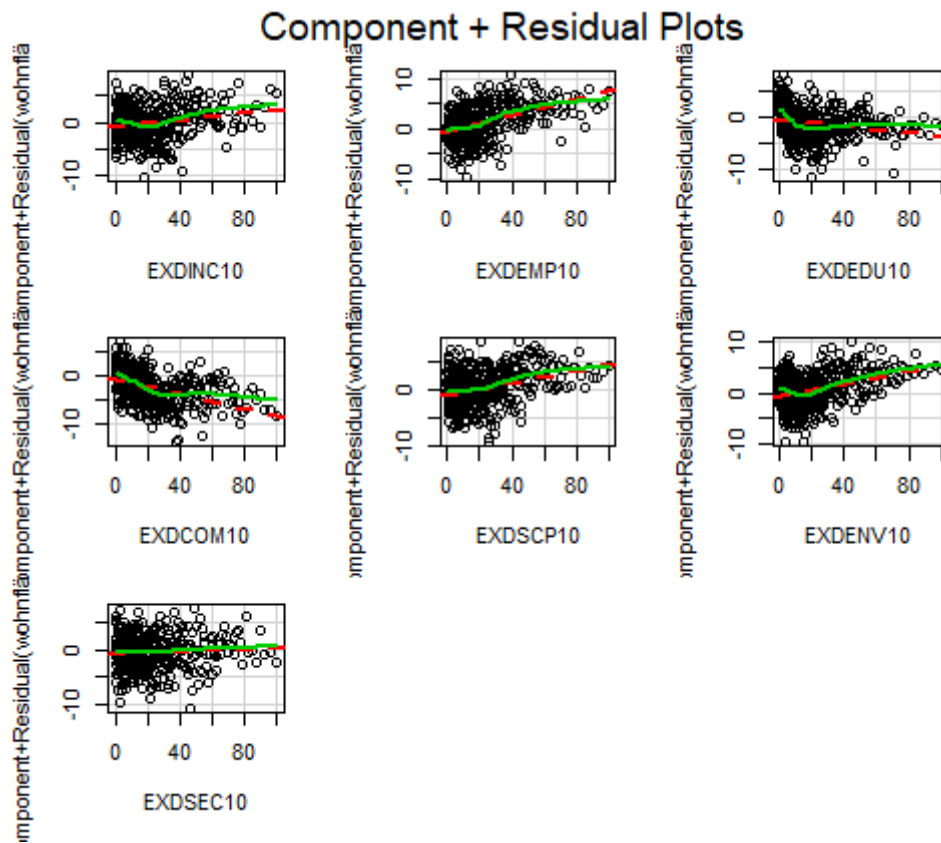

→ Linearity assumption violated for domains of education (EXDEDU10), municipal income (EXDCOM10) and Environment (EXDENV10)

→ But domain weights should be obtained, so we use the untransformed variables



Supplement 5: Results of an exploratory factor analysis of the deprivation domains with the extraction of one factor, method = principal axis factor analysis.

| <b>Standardized loadings</b> | <b>Factor 1</b> | <b>Communality (<math>u^2</math>)</b> | <b>Specific variance (<math>1 - u^2</math>)</b> |
|------------------------------|-----------------|---------------------------------------|-------------------------------------------------|
| <b>Income</b>                | 0.92            | 0.85                                  | 0.15                                            |
| <b>Employment</b>            | 0.76            | 0.58                                  | 0.42                                            |
| <b>Education</b>             | -0.36           | 0.13                                  | 0.87                                            |
| <b>Municipal income</b>      | 0.87            | 0.75                                  | 0.25                                            |
| <b>Social capital</b>        | 0.80            | 0.64                                  | 0.36                                            |
| <b>Environment</b>           | -0.23           | 0.06                                  | 0.94                                            |
| <b>Security</b>              | -0.05           | 0.01                                  | 0.99                                            |

| <b>Model</b>                                           | <b>Factor 1</b> |
|--------------------------------------------------------|-----------------|
| <b>Variance, explained by the factor (SS loadings)</b> | 3.01            |
| <b>Proportion of total variance</b>                    | 0.43            |

| <b>Model fit measures</b>                          |                     |
|----------------------------------------------------|---------------------|
| <b>Root mean square of the residuals (RMSR)</b>    | 0.17                |
| <b>Likelihood chi square</b>                       | 584.65 (p < 0.001)  |
| <b>Tucker-Lewis index of factoring reliability</b> | 0.50                |
| <b>RMSEA index (confidence interval)</b>           | 0.32 ([0.30; 0.34]) |
| <b>BIC</b>                                         | 500.35              |

Source: Tables output from R and own presentation

Supplement 6: Test<sup>1</sup> of the differences in the Spearman correlation coefficients for the relationship of the GIMD<sup>2</sup> versions and both total and premature mortality

| Total mortality               | Original weighting                        | Equal weighting            | Linear regression                        | Maximization algorithm        | Factor analysis                           |
|-------------------------------|-------------------------------------------|----------------------------|------------------------------------------|-------------------------------|-------------------------------------------|
| <b>Original weighting</b>     | 0                                         | 0.043**<br>[0.015, 0.074]  | 0.014 <sup>n.s.</sup><br>[-0.006, 0.034] | -0.037***<br>[-0.060, -0.016] | -0.020**<br>[-0.038, -0.005]              |
| <b>Equal weighting</b>        | -0.043**<br>[-0.074, -0.015]              | 0                          | -0.029*<br>[-0.059, -0.001]              | -0.080***<br>[-0.122, -0.041] | -0.063***<br>[-0.105, -0.025]             |
| <b>Linear regression</b>      | -0.014 <sup>n.s.</sup><br>[-0.034, 0.006] | 0.029*<br>[0.001, 0.059]   | 0                                        | -0.051***<br>[-0.080, -0.024] | -0.034**<br>[-0.059, -0.011]              |
| <b>Maximization algorithm</b> | 0.037***<br>[0.016, 0.060]                | 0.080***<br>[0.041, 0.122] | 0.051***<br>[0.024, 0.080]               | 0                             | 0.016**<br>[0.003, 0.031]                 |
| <b>Factor analysis</b>        | 0.020**<br>[0.005, 0.038]                 | 0.063***<br>[0.025, 0.105] | 0.034**<br>[0.011, 0.059]                | -0.016**<br>[-0.031, -0.003]  | 0                                         |
| <b>Premature mortality</b>    |                                           |                            |                                          |                               |                                           |
| <b>Original weighting</b>     | 0                                         | 0.068***<br>[0.044, 0.097] | 0.028***<br>[0.012, 0.049]               | -0.065***<br>[-0.093, -0.043] | -0.005 <sup>n.s.</sup><br>[-0.021, 0.019] |
| <b>Equal weighting</b>        | -0.068***<br>[-0.097, -0.044]             | 0                          | -0.040***                                | -0.133***<br>[-0.174, -0.098] | -0.073***<br>[0.110, -0.040]              |
| <b>Linear regression</b>      | -0.028***<br>[-0.049, -0.012]             | -0.040***                  | 0                                        | -0.094***<br>[-0.128, -0.066] | -0.034***<br>[-0.014, -0.057]             |
| <b>Maximization algorithm</b> | 0.065***<br>[0.043, 0.093]                | 0.133***<br>[0.098, 0.174] | 0.094***<br>[0.066, 0.128]               | 0                             | 0.060***<br>[0.037, 0.088]                |
| <b>Factor analysis</b>        | 0.005 <sup>n.s.</sup><br>[-0.019, 0.021]  | 0.073***<br>[0.040, 0.110] | 0.034***<br>[0.014, 0.057]               | -0.060***<br>[-0.088, -0.037] | 0                                         |

\*\*\* p < 0.001; \*\* p < 0.01; \* p < 0.05; n.s. not significant, 95% confidence intervals in square brackets

<sup>1</sup> Test of the significance of the differences with Williams's t-test for paired correlations

<sup>2</sup> **GIMD:** German Index of Multiple Deprivation

**Original weighting:** Spearman correlation between GIMD (weighting according to Maier et al. [8]) and both total and premature mortality;

**Equal weighting:** Spearman correlation between GIMD (domains equally weighted) and both total and premature mortality;

**Linear regression:** Spearman correlation between GIMD (weighting of the domains with regression coefficients with a deprivation proxy as dependent and domains as independent variables) and both total and

premature mortality;

**Maximization algorithm:** Spearman correlation between GIMD (weighting of the domains for the maximum Spearman correlation between overall index and mortality) and both total and premature mortality;

**Factor analysis:** Spearman correlation between GIMD (weighting of the domains with loadings from principal axis factoring) and both total and premature mortality.

Supplement 7: Corrected Test<sup>1</sup> of the differences in the Spearman correlation coefficients for the relationship of the GIMD<sup>2</sup> versions and both total and premature mortality.

| Total mortality<br>(all age groups)            | Original<br>weighting  | Equal<br>weighting | Linear<br>regression  | Maximization<br>algorithm | Factor<br>analysis     |
|------------------------------------------------|------------------------|--------------------|-----------------------|---------------------------|------------------------|
| <b>Original weighting</b>                      | 0                      | 0.043*             | 0.014 <sup>n.s.</sup> | -0.037**                  | -0.020*                |
| <b>Equal weighting</b>                         | -0.043*                | 0                  | -0.029*               | -0.080***                 | -0.064**               |
| <b>Linear regression</b>                       | -0.014 <sup>n.s.</sup> | 0.029*             | 0                     | -0.051 ***                | -0.034*                |
| <b>Maximization<br/>algorithm</b>              | 0.037**                | 0.080**            | 0.051**               | 0                         | 0.016*                 |
| <b>Factor analysis</b>                         | 0.020*                 | 0.064**            | 0.034*                | -0.016 *                  | 0                      |
| <b>Premature mortality<br/>(&lt; 65 years)</b> |                        |                    |                       |                           |                        |
| <b>Original weighting</b>                      | 0                      | 0.068***           | 0.028***              | -0.065***                 | -0.005 <sup>n.s.</sup> |
| <b>Equal weighting</b>                         | -0.068***              | 0                  | -0.040**              | -0.133***                 | -0.073***              |
| <b>Linear regression</b>                       | -0.028***              | -0.040**           | 0                     | -0.094 ***                | -0.034***              |
| <b>Maximization<br/>algorithm</b>              | 0.065***               | 0.133***           | 0.094 ***             | 0                         | 0.060***               |
| <b>Factor analysis</b>                         | 0.005 <sup>n.s.</sup>  | 0.073***           | 0.034***              | -0.060***                 | 0                      |

\*\*\* p < 0.001; \*\* p < 0.01; \* p < 0.05; n.s. not significant

<sup>1</sup> Test of the significance of the differences with Williams's t-test for paired correlations

<sup>2</sup> **GIMD:** German Index of Multiple Deprivation

**Original weighting:** Spearman correlation between GIMD (weighting according to Maier et al. [8]) and both total and premature mortality;

**Equal weighting:** Spearman correlation between GIMD (domains equally weighted) and both total and premature mortality;

**Linear regression:** Spearman correlation between GIMD (weighting of the domains with regression

coefficients with a deprivation proxy as dependent and domains as independent variables) and both total and premature mortality;

**Maximization algorithm:** Spearman correlation between GIMD (weighting of the domains for the maximum Spearman correlation between overall index and mortality) and both total and premature mortality;

**Factor analysis:** Spearman correlation between GIMD (weighting of the domains with loadings from principal axis factoring) and both total and premature mortality.
